# Supplementary material for: Microbial Community Dynamics During Lake Ice Freezing
Source: PubMed Central journal article supplement (PMC6470161; doi:10.1038/s41598-019-42609-9), 2019-04-17
Supplement: 41598_2019_42609_MOESM1_ESM.pdf [file 41598_2019_42609_MOESM1_ESM.pdf]

# **Microbial Community Dynamics During Lake Ice Freezing**

**Timothy M. Butler<sup>1</sup>, Anna-Catharina Wilhelm<sup>1</sup>, Amber C. Dwyer<sup>1</sup>, Paige N. Webb<sup>1</sup>,  
Andrew L. Baldwin<sup>1</sup>, Stephen M. Techtmann<sup>1</sup>**

<sup>1</sup>Department of Biological Sciences, Michigan Technology University, Houghton MI

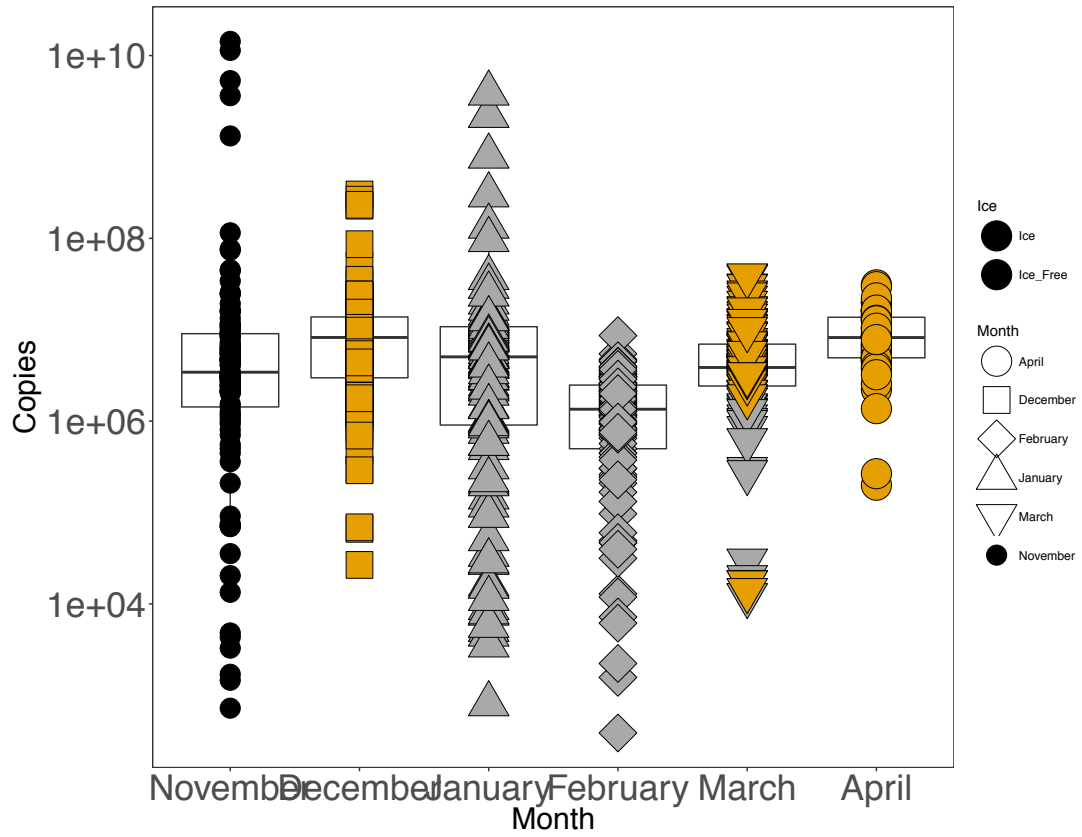

**Supplemental Figure 1:** Abundance of Bacterial 16S rRNA genes across the time series separated by month of sampling. Samples from ice-free conditions are shown in orange and samples from ice covered times are shown in gray

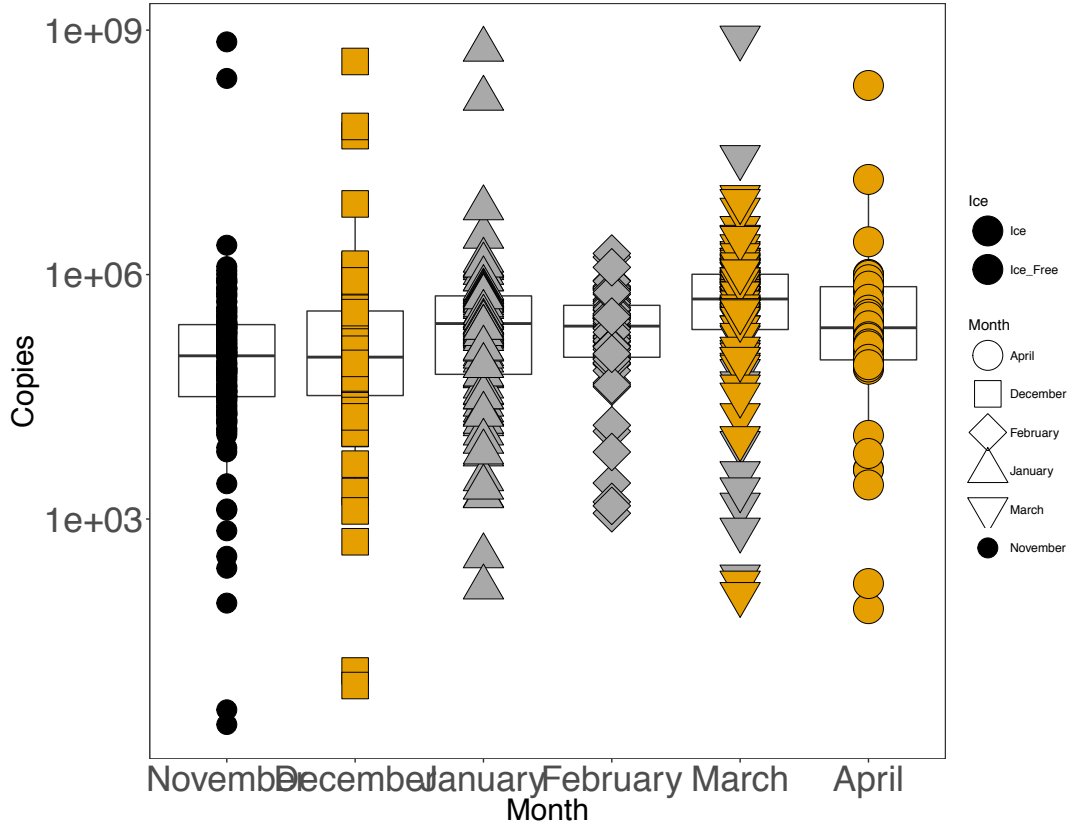

**Supplemental Figure 2:** Abundance of archaeal 16S rRNA genes across the time series separated by month of sampling. Samples from ice-free conditions are shown in orange and samples from ice covered times are shown in gray

**Supplemental Table 1:** Kruskal-Wallis test comparing the log bacterial copies by months returned the following statistics:  $p\text{-value} = < 2.2 \times 10^{-16}$ ,  $\chi^2 = 115.88$ , degrees of freedom = 5. Dunn test comparing log of bacterial abundance for each month. P-values of adjusted for multiple comparisons using Bonferroni correction and shown in the upper triangle and significant comparisons are shown in bold. Z stats are shown in the lower triangle in italic.

| Month - log Copies - Bact | November      | December       | January        | February           | March              | April              |
|---------------------------|---------------|----------------|----------------|--------------------|--------------------|--------------------|
| November                  |               | <b>0.01213</b> | 1              | <b>&lt;0.00001</b> | 1                  | <b>0.00398</b>     |
| December                  | <i>3.349</i>  |                | <b>0.03101</b> | <b>&lt;0.00001</b> | <b>0.0219</b>      | 1                  |
| January                   | <i>0.293</i>  | <i>3.080</i>   |                | <b>&lt;0.00001</b> | 1                  | <b>0.00945</b>     |
| February                  | <i>-6.105</i> | <i>9.266</i>   | <i>-6.426</i>  |                    | <b>&lt;0.00001</b> | <b>&lt;0.00001</b> |
| March                     | <i>0.149</i>  | <i>3.181</i>   | <i>0.140</i>   | <i>-6.210</i>      |                    | <b>0.00682</b>     |
| April                     | <i>3.646</i>  | <i>0.798</i>   | <i>3.418</i>   | <i>8.647</i>       | <i>3.505</i>       |                    |

**Supplemental Table 2:** Kruskal-Wallis test comparing months returned the following statistics: p-value =  $3.68 \times 10^{-9}$ , chi-squared = 47.925, degrees of freedom = 5. Dunn test comparing log of archaeal abundance for each month. P-values of adjusted for multiple comparisons using Bonferroni correction and shown in the upper triangle and significant comparisons are shown in bold. Z stats are shown in the lower triangle in italic.

| Month - log<br>Copies - Arch | November     | December      | January       | February      | March              | April  |
|------------------------------|--------------|---------------|---------------|---------------|--------------------|--------|
| November                     |              | 1             | <b>0.0117</b> | 0.0736        | <b>&lt;0.00001</b> | 0.0521 |
| December                     | <i>1.109</i> |               | 0.967         | 1             | <b>&lt;0.00001</b> | 1      |
| January                      | <i>3.358</i> | <i>-1.848</i> |               | 1             | <b>0.0358</b>      | 1      |
| February                     | <i>2.812</i> | <i>-1.537</i> | <i>-0.160</i> |               | 0.0575             | 1      |
| March                        | <i>6.577</i> | <i>-4.637</i> | <i>-3.037</i> | <i>-2.891</i> |                    | 0.465  |
| April                        | <i>2.922</i> | <i>1.789</i>  | <i>0.280</i>  | <i>0.394</i>  | <i>-2.156</i>      |        |

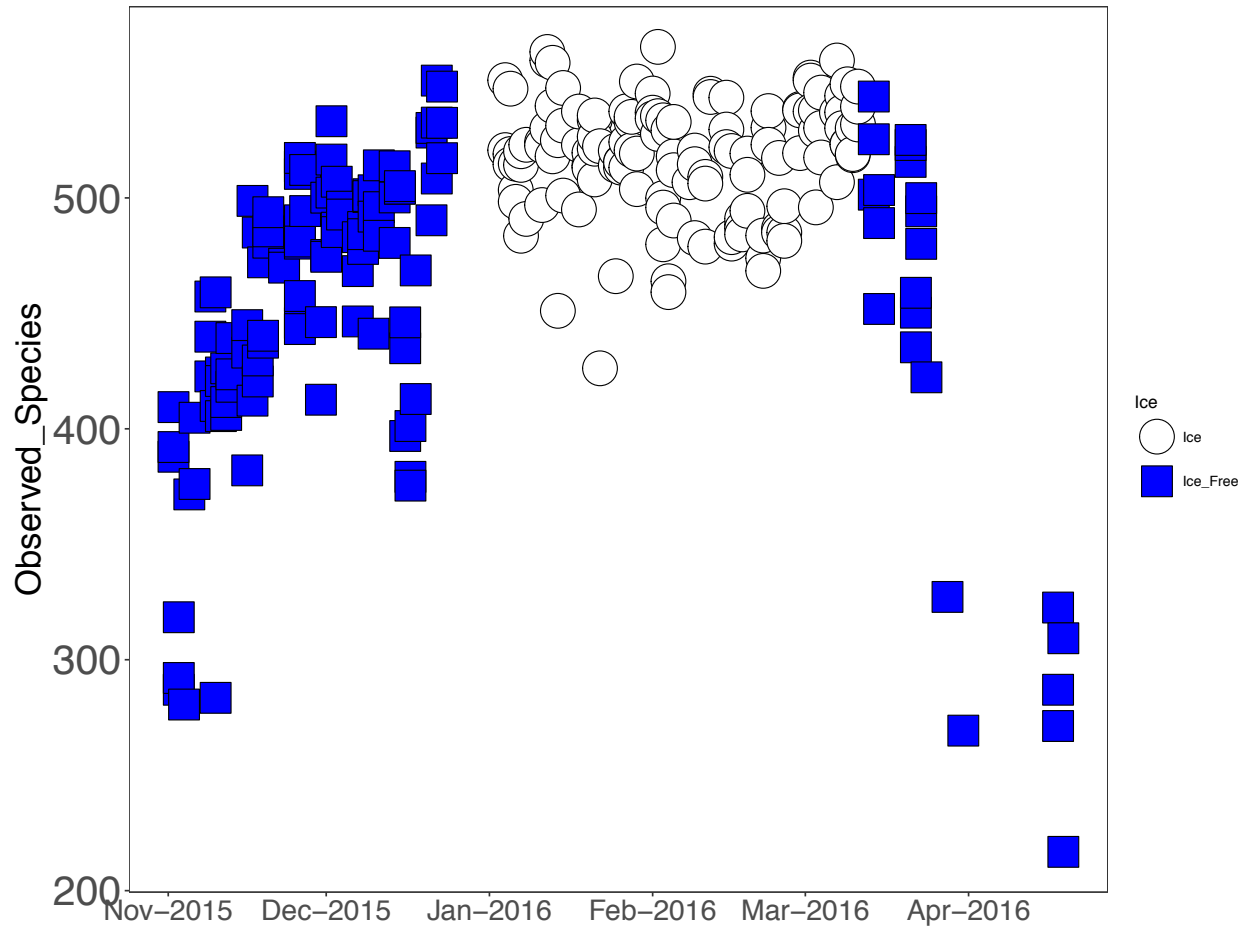

**Supplemental Figure 3:** Observed species alpha diversity metric across the time series. Samples from ice-free times are colored in blue and samples from ice-covered times are white. Kruskal-Wallis test for significance of ice cover on Observed Species:  $p$ -value =  $<0.00001$ , chi squared = 94.206, degrees of freedom = 1)

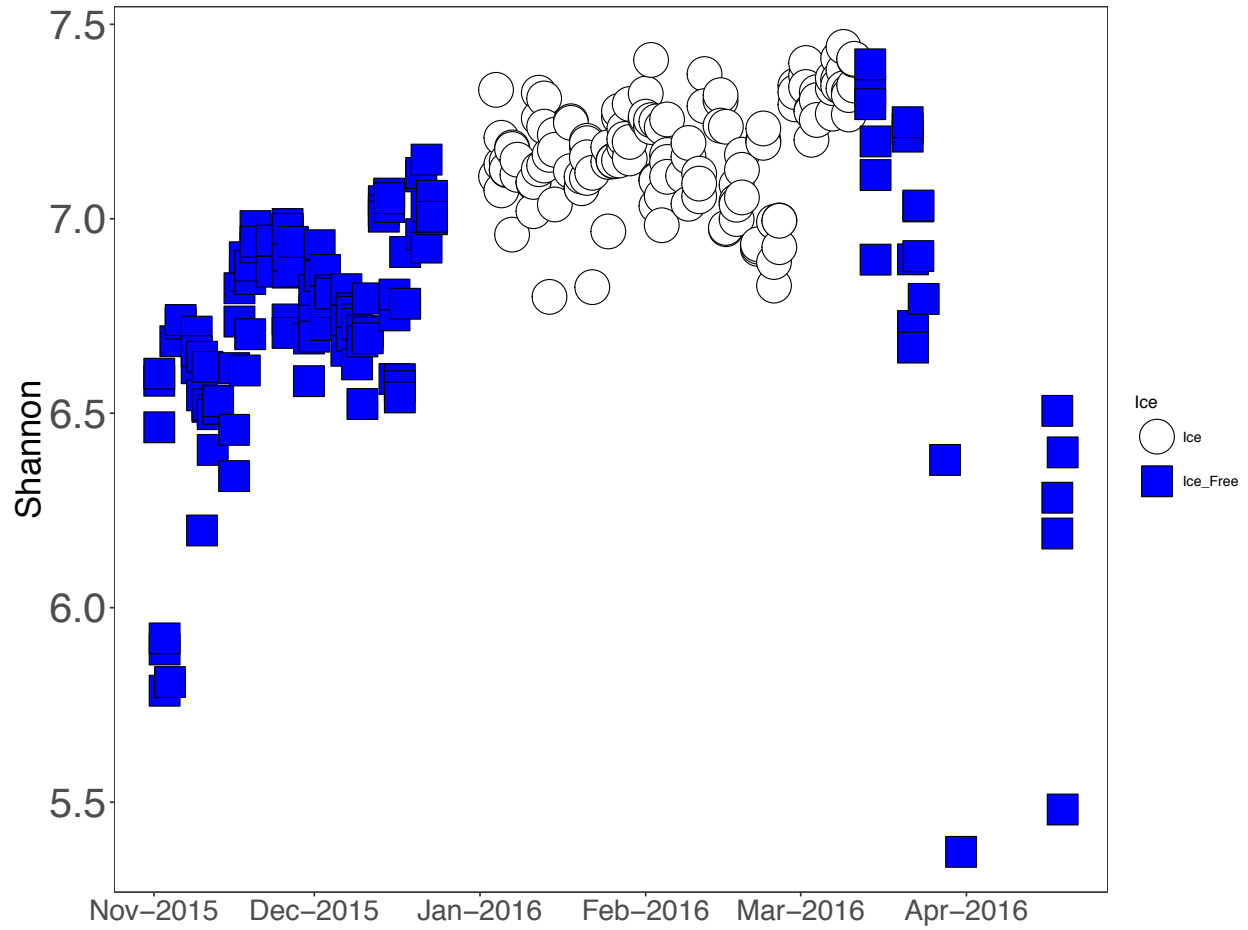

**Supplemental Figure 4:** Shannon diversity metric across the time series. Samples from ice-free times are colored in blue and samples from ice-covered times are white. Kruskal-Wallis test for significance of ice cover on Shannon diversity: p-value =  $<0.00001$ , chi squared = 139.82, degrees of freedom = 1)

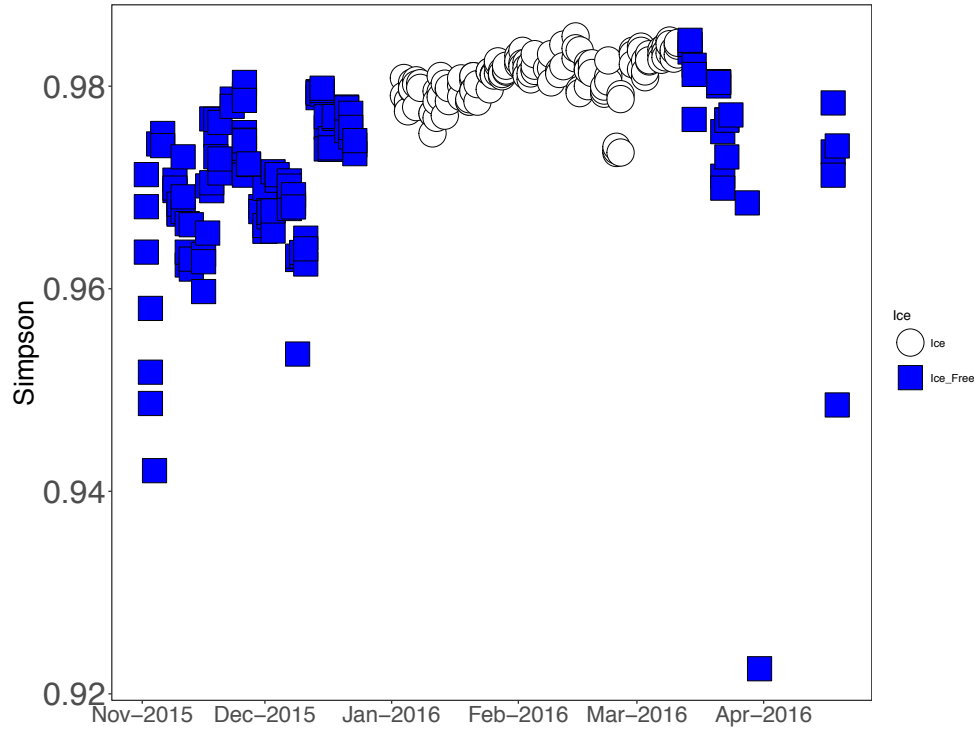

**Supplemental Figure 5:** Simpson diversity metric across the time series. Samples from ice-free times are colored in blue and samples from ice-covered times are white. Kruskal-Wallis test for significance of ice cover on Shannon diversity:  $p$ -value =  $<0.00001$ , chi squared = 144.96, degrees of freedom = 1)

**Supplemental Table 3:** Dunn test comparing Faith's Phylogenetic Diversity for each month.  $P$ -values of adjusted for multiple comparisons using Bonferroni correction and shown in the upper triangle and significant comparisons are shown in bold.  $Z$  stats are shown in the lower triangle in italic.

| Faith's Phylogenetic | November      | December       | January            | February           | March           | April              |
|----------------------|---------------|----------------|--------------------|--------------------|-----------------|--------------------|
| November             |               | <b>0.01988</b> | <b>&lt;0.00001</b> | <b>&lt;0.00001</b> | <b>0.000015</b> | 1                  |
| December             | <i>3.210</i>  |                | <b>&lt;0.00001</b> | <b>&lt;0.00001</b> | 1               | <b>0.078</b>       |
| January              | <i>9.465</i>  | <i>-6.006</i>  |                    | 1                  | <b>0.00127</b>  | <b>&lt;0.00001</b> |
| February             | <i>8.954</i>  | <i>-5.523</i>  | <i>-0.469</i>      |                    | <b>0.00759</b>  | <b>&lt;0.00001</b> |
| March                | <i>4.898</i>  | <i>-1.780</i>  | <i>3.930</i>       | <i>3.477</i>       |                 | <b>0.00548</b>     |
| April                | <i>-1.450</i> | <i>-2.793</i>  | <i>-5.333</i>      | <i>-5.137</i>      | <i>-3.563</i>   |                    |

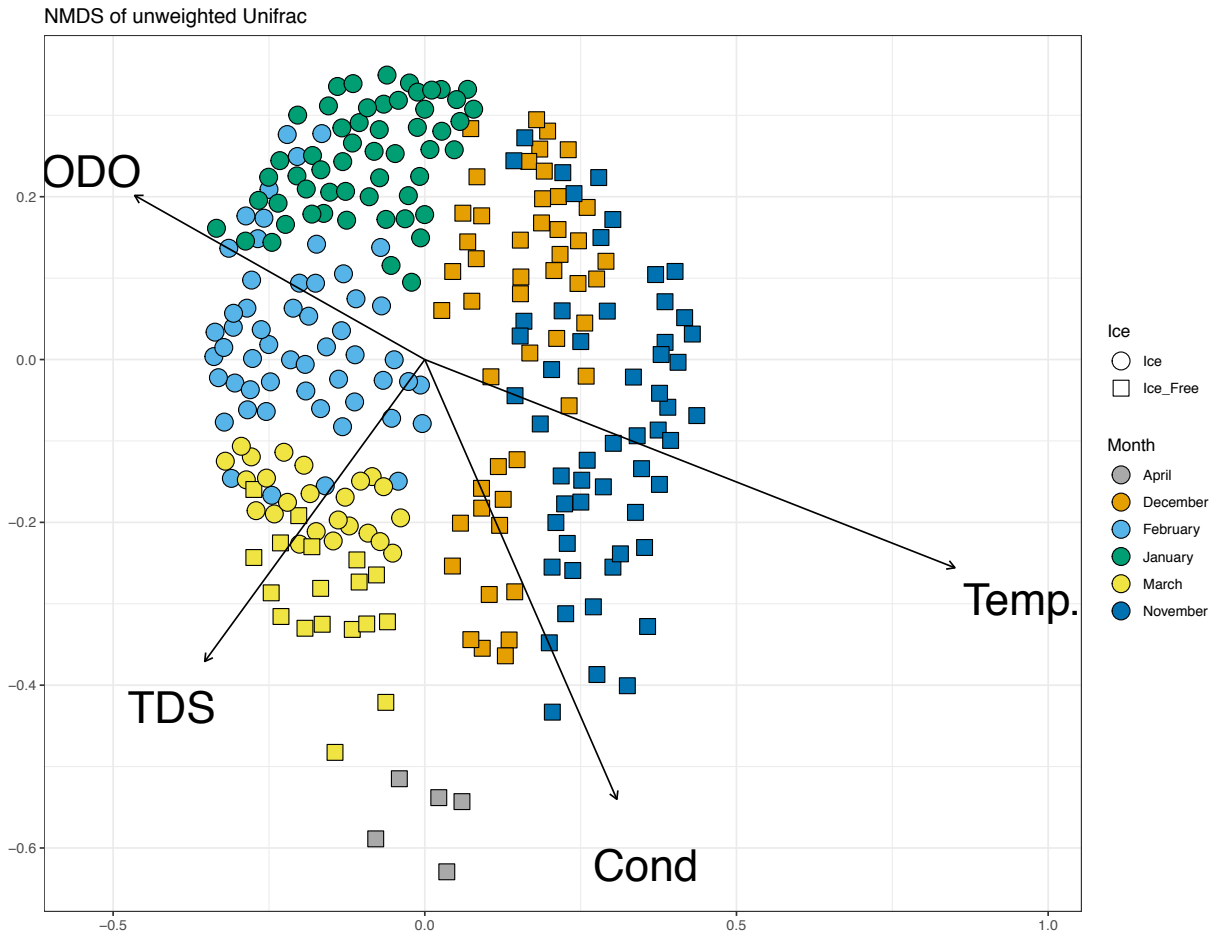

**Supplementary Figure 6: Non-metric multidimensional scaling of unweighted unifrac distances.** Stress for this plot is 0.2334. Environmental factors were fit to the NMDS and factors that significantly fit the data are shown as vectors.



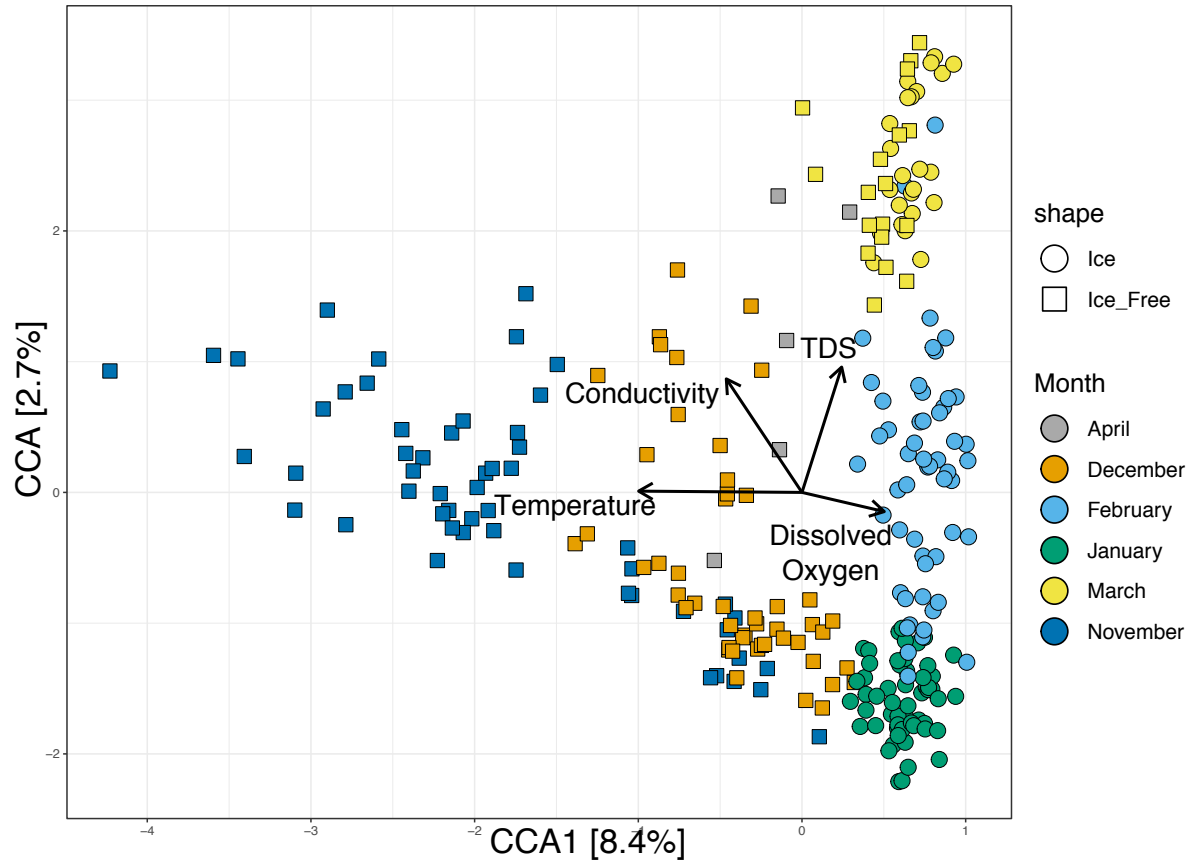

Supplementary Figure 7: CCA analysis of weighted unfrac distances.

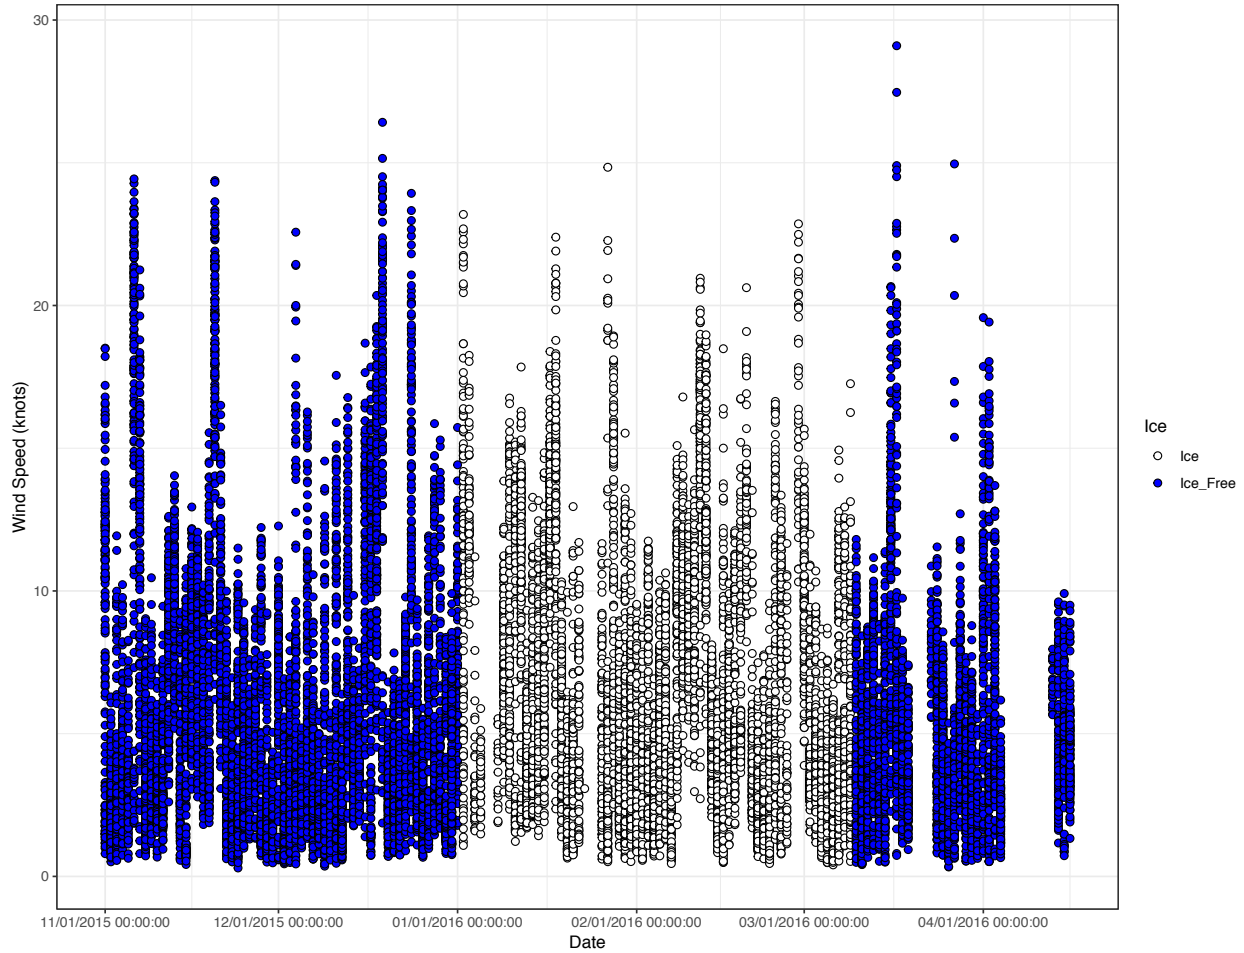

**Supplementary Figure 8:** Wind Speeds measured that GLRCMET weather station located at the Michigan Tech Great Lakes Research Center (47.120138, 552871). ([http://uglos.mtu.edu/station\\_page.php?station=GLRCMET](http://uglos.mtu.edu/station_page.php?station=GLRCMET)). Wind speeds measured during times of ice cover are shown as white circles and times of high wind are shown as blue circles.

**Supplemental Table 4:** qPCR data for archaeal 16S rRNA gene copy numbers for determination of bacterial abundance.

| Date    | Copies Archaea | log archaeal copies | Ice      | Month    |
|---------|----------------|---------------------|----------|----------|
| 11/2/15 | 109246.1949    | 5.038406319         | Ice Free | November |
| 11/2/15 | 101986.0692    | 5.008540853         | Ice Free | November |
| 11/2/15 | 97462.85977    | 4.98883915          | Ice Free | November |
| 11/2/15 | 68546.14317    | 4.835983024         | Ice Free | November |
| 11/2/15 | 51825.79809    | 4.714545999         | Ice Free | November |
| 11/2/15 | 29521.66711    | 4.470140879         | Ice Free | November |
| 11/3/15 | 391318.5314    | 5.592530415         | Ice Free | November |
| 11/3/15 | 354412.1335    | 5.549508582         | Ice Free | November |
| 11/3/15 | 194848.9632    | 5.289698099         | Ice Free | November |

|          |             |             |          |          |
|----------|-------------|-------------|----------|----------|
| 11/3/15  | 124765.6855 | 5.096095157 | Ice Free | November |
| 11/3/15  | 73451.9452  | 4.866003302 | Ice Free | November |
| 11/3/15  | 23620.60344 | 4.373290988 | Ice Free | November |
| 11/4/15  | 302551.3032 | 5.480799028 | Ice Free | November |
| 11/4/15  | 27090.29529 | 4.432813739 | Ice Free | November |
| 11/4/15  | 19529.31272 | 4.29068696  | Ice Free | November |
| 11/4/15  | 16229.484   | 4.210304712 | Ice Free | November |
| 11/4/15  | 10787.06296 | 4.032903214 | Ice Free | November |
| 11/4/15  | 1328.192983 | 3.123261181 | Ice Free | November |
| 11/5/15  | 255423103.3 | 8.407260177 | Ice Free | November |
| 11/5/15  | 1282.360713 | 3.108010204 | Ice Free | November |
| 11/5/15  | 92.94243221 | 1.968214033 | Ice Free | November |
| 11/5/15  | 4.557442058 | 0.658721156 | Ice Free | November |
| 11/6/15  | 350856.8432 | 5.545129952 | Ice Free | November |
| 11/6/15  | 247517.6078 | 5.393606099 | Ice Free | November |
| 11/6/15  | 197120.9763 | 5.294732841 | Ice Free | November |
| 11/6/15  | 196520.0754 | 5.293406922 | Ice Free | November |
| 11/6/15  | 19022.72939 | 4.27927283  | Ice Free | November |
| 11/7/15  | 384839.0194 | 5.585279099 | Ice Free | November |
| 11/8/15  | 12379.31098 | 4.092696473 | Ice Free | November |
| 11/9/15  | 672481.6396 | 5.827680432 | Ice Free | November |
| 11/9/15  | 535183.5971 | 5.728502794 | Ice Free | November |
| 11/9/15  | 256164.1268 | 5.408518311 | Ice Free | November |
| 11/9/15  | 227130.9931 | 5.3562764   | Ice Free | November |
| 11/10/15 | 41477.82159 | 4.617815939 | Ice Free | November |
| 11/10/15 | 6668.890094 | 3.82405356  | Ice Free | November |
| 11/11/15 | 179345.6379 | 5.253690818 | Ice Free | November |
| 11/11/15 | 147539.313  | 5.168907757 | Ice Free | November |
| 11/11/15 | 139827.9754 | 5.145594069 | Ice Free | November |
| 11/11/15 | 128801.7353 | 5.109921714 | Ice Free | November |
| 11/11/15 | 57261.42379 | 4.757862142 | Ice Free | November |
| 11/11/15 | 29087.98996 | 4.463713712 | Ice Free | November |
| 11/11/15 | 15482.16741 | 4.189831759 | Ice Free | November |
| 11/12/15 | 1119924.262 | 6.049188653 | Ice Free | November |
| 11/12/15 | 276259.9551 | 5.441317937 | Ice Free | November |
| 11/12/15 | 257387.9566 | 5.410588222 | Ice Free | November |
| 11/12/15 | 222364.3657 | 5.347065192 | Ice Free | November |
| 11/12/15 | 221943.0092 | 5.34624147  | Ice Free | November |
| 11/12/15 | 54945.61134 | 4.73993301  | Ice Free | November |

|          |             |             |          |          |
|----------|-------------|-------------|----------|----------|
| 11/12/15 | 12969.53952 | 4.112924557 | Ice Free | November |
| 11/13/15 | 2291966.865 | 6.360208335 | Ice Free | November |
| 11/13/15 | 657981.6442 | 5.818213778 | Ice Free | November |
| 11/13/15 | 246892.5747 | 5.392508029 | Ice Free | November |
| 11/13/15 | 124630.5801 | 5.095624616 | Ice Free | November |
| 11/13/15 | 43537.93568 | 4.638867833 | Ice Free | November |
| 11/13/15 | 38116.86574 | 4.581117182 | Ice Free | November |
| 11/13/15 | 31765.13802 | 4.501950747 | Ice Free | November |
| 11/13/15 | 249.0974745 | 2.396369324 | Ice Free | November |
| 11/16/15 | 212681.0049 | 5.327728704 | Ice Free | November |
| 11/16/15 | 113294.1828 | 5.054207611 | Ice Free | November |
| 11/16/15 | 80099.59894 | 4.903630342 | Ice Free | November |
| 11/16/15 | 62039.65807 | 4.792669396 | Ice Free | November |
| 11/16/15 | 15050.50953 | 4.177551203 | Ice Free | November |
| 11/16/15 | 348.7633218 | 2.542530805 | Ice Free | November |
| 11/17/15 | 717243519.4 | 8.855666633 | Ice Free | November |
| 11/17/15 | 796282.7804 | 5.901067324 | Ice Free | November |
| 11/17/15 | 233996.6343 | 5.369209611 | Ice Free | November |
| 11/17/15 | 165865.1533 | 5.219755154 | Ice Free | November |
| 11/17/15 | 20013.10537 | 4.301314482 | Ice Free | November |
| 11/17/15 | 18973.6307  | 4.278150443 | Ice Free | November |
| 11/18/15 | 847246.3796 | 5.928009722 | Ice Free | November |
| 11/18/15 | 154159.2549 | 5.187969603 | Ice Free | November |
| 11/18/15 | 86850.95722 | 4.938774609 | Ice Free | November |
| 11/18/15 | 49761.37889 | 4.696892406 | Ice Free | November |
| 11/18/15 | 11594.13409 | 4.064238319 | Ice Free | November |
| 11/18/15 | 7512.632187 | 3.875792127 | Ice Free | November |
| 11/19/15 | 595053.3209 | 5.774555883 | Ice Free | November |
| 11/19/15 | 190402.6469 | 5.279672981 | Ice Free | November |
| 11/19/15 | 108012.3797 | 5.033473534 | Ice Free | November |
| 11/19/15 | 107362.8931 | 5.030854206 | Ice Free | November |
| 11/19/15 | 80604.34504 | 4.906358453 | Ice Free | November |
| 11/19/15 | 64978.16019 | 4.81276741  | Ice Free | November |
| 11/20/15 | 464788.6457 | 5.66725551  | Ice Free | November |
| 11/20/15 | 303790.4476 | 5.482574114 | Ice Free | November |
| 11/20/15 | 177130.5656 | 5.248293509 | Ice Free | November |
| 11/20/15 | 100714.0766 | 5.003090175 | Ice Free | November |
| 11/20/15 | 37298.69317 | 4.571693616 | Ice Free | November |
| 11/20/15 | 36741.27377 | 4.565154209 | Ice Free | November |

|          |             |             |          |          |
|----------|-------------|-------------|----------|----------|
| 11/23/15 | 1009285.869 | 6.004014193 | Ice Free | November |
| 11/23/15 | 219141.5197 | 5.340724669 | Ice Free | November |
| 11/23/15 | 113467.6009 | 5.054871872 | Ice Free | November |
| 11/23/15 | 32048.87309 | 4.505812763 | Ice Free | November |
| 11/23/15 | 32041.72768 | 4.505715925 | Ice Free | November |
| 11/23/15 | 20796.64353 | 4.317993248 | Ice Free | November |
| 11/24/15 | 901659.4911 | 5.955042559 | Ice Free | November |
| 11/24/15 | 818474.0099 | 5.913004893 | Ice Free | November |
| 11/24/15 | 158341.3974 | 5.199594473 | Ice Free | November |
| 11/24/15 | 69701.96221 | 4.843245004 | Ice Free | November |
| 11/24/15 | 62317.30717 | 4.794608679 | Ice Free | November |
| 11/24/15 | 34470.44706 | 4.537446916 | Ice Free | November |
| 11/25/15 | 688165.3403 | 5.837692795 | Ice Free | November |
| 11/25/15 | 138937.3566 | 5.142819032 | Ice Free | November |
| 11/25/15 | 115120.1736 | 5.061151436 | Ice Free | November |
| 11/25/15 | 62454.70502 | 4.795565161 | Ice Free | November |
| 11/25/15 | 36481.08548 | 4.562067752 | Ice Free | November |
| 11/25/15 | 24853.96539 | 4.395395689 | Ice Free | November |
| 11/25/15 | 21833.85702 | 4.339130462 | Ice Free | November |
| 11/26/15 | 1250721.921 | 6.097160762 | Ice Free | November |
| 11/26/15 | 324328.9561 | 5.510985724 | Ice Free | November |
| 11/26/15 | 243175.8596 | 5.38592046  | Ice Free | November |
| 11/26/15 | 68964.66398 | 4.838626625 | Ice Free | November |
| 11/26/15 | 716.9544498 | 2.855491565 | Ice Free | November |
| 11/27/15 | 126035.0325 | 5.100491278 | Ice Free | November |
| 11/27/15 | 68115.49377 | 4.833245909 | Ice Free | November |
| 11/27/15 | 45282.87546 | 4.655933997 | Ice Free | November |
| 11/27/15 | 16683.16872 | 4.222278542 | Ice Free | November |
| 11/27/15 | 2710.179617 | 3.432998075 | Ice Free | November |
| 11/30/15 | 567307.3285 | 5.753818394 | Ice Free | November |
| 11/30/15 | 463891.9724 | 5.666416857 | Ice Free | November |
| 11/30/15 | 42204.15937 | 4.625355254 | Ice Free | November |
| 11/30/15 | 36531.50403 | 4.562667553 | Ice Free | November |
| 11/30/15 | 3.006739724 | 0.478095835 | Ice Free | November |
| 12/1/15  | 50712978.53 | 7.705119119 | Ice Free | December |
| 12/1/15  | 892832.8316 | 5.950770152 | Ice Free | December |
| 12/1/15  | 521644.1216 | 5.717374318 | Ice Free | December |
| 12/1/15  | 305889.7803 | 5.485564968 | Ice Free | December |
| 12/1/15  | 291477.0503 | 5.464604366 | Ice Free | December |

|          |             |             |          |          |
|----------|-------------|-------------|----------|----------|
| 12/1/15  | 185742.248  | 5.268910697 | Ice Free | December |
| 12/2/15  | 1293406.83  | 6.11173515  | Ice Free | December |
| 12/2/15  | 902188.7523 | 5.955297408 | Ice Free | December |
| 12/2/15  | 211909.2206 | 5.326149854 | Ice Free | December |
| 12/2/15  | 198107.6531 | 5.296901253 | Ice Free | December |
| 12/2/15  | 33273.84123 | 4.52210294  | Ice Free | December |
| 12/2/15  | 29134.13989 | 4.464402201 | Ice Free | December |
| 12/3/15  | 412300703.2 | 8.615214076 | Ice Free | December |
| 12/3/15  | 275660.3734 | 5.44037434  | Ice Free | December |
| 12/3/15  | 80642.05001 | 4.906561559 | Ice Free | December |
| 12/3/15  | 35070.66474 | 4.544943998 | Ice Free | December |
| 12/3/15  | 31269.89439 | 4.495126414 | Ice Free | December |
| 12/3/15  | 19277.1591  | 4.285043032 | Ice Free | December |
| 12/3/15  | 11199.98197 | 4.049217324 | Ice Free | December |
| 12/4/15  | 454795.5004 | 5.657816159 | Ice Free | December |
| 12/4/15  | 209003.4976 | 5.320153554 | Ice Free | December |
| 12/4/15  | 4714.607854 | 3.673445575 | Ice Free | December |
| 12/4/15  | 525.931142  | 2.720928887 | Ice Free | December |
| 12/7/15  | 380106.7975 | 5.579905636 | Ice Free | December |
| 12/7/15  | 350048.9019 | 5.54412872  | Ice Free | December |
| 12/7/15  | 248190.2708 | 5.394784753 | Ice Free | December |
| 12/7/15  | 200144.7745 | 5.301344256 | Ice Free | December |
| 12/7/15  | 189728.8522 | 5.278133379 | Ice Free | December |
| 12/8/15  | 1059397.234 | 6.025058835 | Ice Free | December |
| 12/8/15  | 106342.3886 | 5.026706411 | Ice Free | December |
| 12/8/15  | 35124.58497 | 4.545611201 | Ice Free | December |
| 12/8/15  | 27087.95093 | 4.432776154 | Ice Free | December |
| 12/8/15  | 18553.92902 | 4.268435891 | Ice Free | December |
| 12/8/15  | 2175.471546 | 3.337553407 | Ice Free | December |
| 12/9/15  | 660697.2744 | 5.820002515 | Ice Free | December |
| 12/9/15  | 261047.3736 | 5.416719328 | Ice Free | December |
| 12/9/15  | 123171.584  | 5.090510527 | Ice Free | December |
| 12/9/15  | 69731.13533 | 4.843426736 | Ice Free | December |
| 12/9/15  | 13.64898165 | 1.13510025  | Ice Free | December |
| 12/10/15 | 385953.5252 | 5.586535012 | Ice Free | December |
| 12/10/15 | 88489.88503 | 4.946893631 | Ice Free | December |
| 12/10/15 | 56539.08219 | 4.752348754 | Ice Free | December |
| 12/10/15 | 12011.46528 | 4.07959599  | Ice Free | December |
| 12/10/15 | 1257.258086 | 3.099424437 | Ice Free | December |

|          |             |             |          |          |
|----------|-------------|-------------|----------|----------|
| 12/11/15 | 65753731.21 | 7.817920402 | Ice Free | December |
| 12/11/15 | 893321.4631 | 5.951007769 | Ice Free | December |
| 12/11/15 | 85636.48178 | 4.932658817 | Ice Free | December |
| 12/11/15 | 82086.36876 | 4.914271044 | Ice Free | December |
| 12/11/15 | 38643.53032 | 4.587076795 | Ice Free | December |
| 12/14/15 | 148735.2928 | 5.172414033 | Ice Free | December |
| 12/14/15 | 121250.8842 | 5.083684914 | Ice Free | December |
| 12/14/15 | 50728.05782 | 4.705248235 | Ice Free | December |
| 12/14/15 | 48699.84985 | 4.687527622 | Ice Free | December |
| 12/14/15 | 11344.4643  | 4.054783993 | Ice Free | December |
| 12/14/15 | 9.049953072 | 0.956646327 | Ice Free | December |
| 12/15/15 | 868226.2932 | 5.938632934 | Ice Free | December |
| 12/15/15 | 79588.40513 | 4.900849802 | Ice Free | December |
| 12/15/15 | 45257.93327 | 4.655694718 | Ice Free | December |
| 12/15/15 | 24585.29342 | 4.390675396 | Ice Free | December |
| 12/15/15 | 21457.71695 | 4.331583512 | Ice Free | December |
| 12/16/15 | 1341451.07  | 6.127574836 | Ice Free | December |
| 12/16/15 | 55926.19032 | 4.747615236 | Ice Free | December |
| 12/16/15 | 53859.45107 | 4.731261923 | Ice Free | December |
| 12/21/15 | 7364175.857 | 6.867124151 | Ice Free | December |
| 12/21/15 | 836755.7737 | 5.922598718 | Ice Free | December |
| 12/21/15 | 341158.4164 | 5.53295609  | Ice Free | December |
| 12/21/15 | 81306.52169 | 4.910125382 | Ice Free | December |
| 12/21/15 | 17930.32228 | 4.253588096 | Ice Free | December |
| 1/4/16   | 2928497.093 | 6.466644797 | Ice      | January  |
| 1/4/16   | 1343934.57  | 6.128378125 | Ice      | January  |
| 1/4/16   | 1204403.587 | 6.08077204  | Ice      | January  |
| 1/4/16   | 21623.73058 | 4.334930622 | Ice      | January  |
| 1/7/16   | 1309501.661 | 6.117106054 | Ice      | January  |
| 1/7/16   | 1267689.435 | 6.103012871 | Ice      | January  |
| 1/7/16   | 1054405.683 | 6.023007738 | Ice      | January  |
| 1/7/16   | 56763.68208 | 4.754070559 | Ice      | January  |
| 1/12/16  | 1488320.276 | 6.172696398 | Ice      | January  |
| 1/12/16  | 879277.2674 | 5.944125845 | Ice      | January  |
| 1/12/16  | 660955.624  | 5.820172302 | Ice      | January  |
| 1/12/16  | 198864.9157 | 5.29855817  | Ice      | January  |
| 1/12/16  | 1951.317099 | 3.29032785  | Ice      | January  |
| 1/12/16  | 350.5097591 | 2.544700114 | Ice      | January  |
| 1/15/16  | 1297292.743 | 6.113037989 | Ice      | January  |

|         |             |             |     |         |
|---------|-------------|-------------|-----|---------|
| 1/15/16 | 654100.3204 | 5.815644362 | Ice | January |
| 1/15/16 | 610613.0728 | 5.785766098 | Ice | January |
| 1/15/16 | 258021.3107 | 5.411655577 | Ice | January |
| 1/15/16 | 58066.76028 | 4.763927596 | Ice | January |
| 1/15/16 | 25463.35988 | 4.405915708 | Ice | January |
| 1/20/16 | 144605763.5 | 8.160185603 | Ice | January |
| 1/20/16 | 6541246.699 | 6.815660529 | Ice | January |
| 1/20/16 | 565576.3475 | 5.752491239 | Ice | January |
| 1/20/16 | 447046.1432 | 5.650352352 | Ice | January |
| 1/20/16 | 204749.2127 | 5.31122224  | Ice | January |
| 1/20/16 | 105886.2593 | 5.024839606 | Ice | January |
| 1/20/16 | 31154.46564 | 4.493520307 | Ice | January |
| 1/20/16 | 6238.217848 | 3.795060537 | Ice | January |
| 1/21/16 | 578005105.7 | 8.761931675 | Ice | January |
| 1/21/16 | 877870.562  | 5.943430486 | Ice | January |
| 1/21/16 | 343658.7767 | 5.53612744  | Ice | January |
| 1/21/16 | 236876.8072 | 5.374522541 | Ice | January |
| 1/21/16 | 221038.3674 | 5.344467664 | Ice | January |
| 1/21/16 | 178840.7647 | 5.252466518 | Ice | January |
| 1/21/16 | 88533.88761 | 4.947109535 | Ice | January |
| 1/21/16 | 42481.54459 | 4.628200299 | Ice | January |
| 1/21/16 | 35185.67623 | 4.546365902 | Ice | January |
| 1/21/16 | 14648.96307 | 4.165806884 | Ice | January |
| 1/21/16 | 1913.450206 | 3.281817165 | Ice | January |
| 1/22/16 | 686263.7532 | 5.836491061 | Ice | January |
| 1/22/16 | 620811.662  | 5.792959867 | Ice | January |
| 1/22/16 | 307516.9668 | 5.487869082 | Ice | January |
| 1/22/16 | 263911.5734 | 5.421458436 | Ice | January |
| 1/22/16 | 214959.4136 | 5.332356469 | Ice | January |
| 1/22/16 | 191932.4901 | 5.283148498 | Ice | January |
| 1/22/16 | 145.2790694 | 2.162203049 | Ice | January |
| 1/25/16 | 612929.6689 | 5.787410644 | Ice | January |
| 1/25/16 | 581499.7547 | 5.764549536 | Ice | January |
| 1/25/16 | 563163.7243 | 5.750634672 | Ice | January |
| 1/25/16 | 494283.5069 | 5.693976119 | Ice | January |
| 1/25/16 | 478955.3547 | 5.680295033 | Ice | January |
| 1/25/16 | 263940.6095 | 5.421506215 | Ice | January |
| 1/25/16 | 186177.5398 | 5.269927287 | Ice | January |
| 1/25/16 | 98962.02428 | 4.99546857  | Ice | January |



|         |             |             |     |         |
|---------|-------------|-------------|-----|---------|
| 1/25/16 | 59675.90886 | 4.775799042 | Ice | January |
| 1/25/16 | 35995.27941 | 4.556245549 | Ice | January |
| 1/25/16 | 15671.12874 | 4.195100278 | Ice | January |
| 1/25/16 | 11269.23002 | 4.051894244 | Ice | January |
| 1/25/16 | 3093.785542 | 3.490490206 | Ice | January |
| 1/26/16 | 401731.6578 | 5.603936057 | Ice | January |
| 1/26/16 | 291934.6813 | 5.465285691 | Ice | January |
| 1/26/16 | 173726.4765 | 5.239866011 | Ice | January |
| 1/26/16 | 19798.16137 | 4.29662486  | Ice | January |
| 1/27/16 | 568072.4008 | 5.75440369  | Ice | January |
| 1/27/16 | 547508.9598 | 5.738391231 | Ice | January |
| 1/27/16 | 531106.9257 | 5.725181965 | Ice | January |
| 1/27/16 | 346313.8471 | 5.539469857 | Ice | January |
| 1/27/16 | 315321.0379 | 5.498752947 | Ice | January |
| 1/27/16 | 310350.9698 | 5.491853107 | Ice | January |
| 1/27/16 | 253247.6769 | 5.40354547  | Ice | January |
| 1/27/16 | 162742.7887 | 5.211501754 | Ice | January |
| 1/27/16 | 123647.749  | 5.092186214 | Ice | January |
| 1/27/16 | 120688.3602 | 5.081665387 | Ice | January |
| 1/27/16 | 75875.36518 | 4.880100794 | Ice | January |
| 1/27/16 | 31385.01727 | 4.496722372 | Ice | January |
| 1/28/16 | 508264.1145 | 5.706089448 | Ice | January |
| 1/28/16 | 482881.9129 | 5.683840939 | Ice | January |
| 1/28/16 | 421953.7151 | 5.625264815 | Ice | January |
| 1/28/16 | 200593.3462 | 5.302316523 | Ice | January |
| 1/28/16 | 187218.0941 | 5.27234782  | Ice | January |
| 1/28/16 | 19151.48001 | 4.282202342 | Ice | January |
| 1/28/16 | 8924.147743 | 3.950566752 | Ice | January |
| 1/28/16 | 2441.699537 | 3.387692221 | Ice | January |
| 1/29/16 | 528787.3191 | 5.723281032 | Ice | January |
| 1/29/16 | 340216.7059 | 5.531755635 | Ice | January |
| 1/29/16 | 297146.403  | 5.472970477 | Ice | January |
| 1/29/16 | 263469.6867 | 5.420730655 | Ice | January |
| 1/29/16 | 250512.0065 | 5.398828545 | Ice | January |
| 1/29/16 | 223449.5423 | 5.349179469 | Ice | January |
| 1/29/16 | 223038.8136 | 5.348380446 | Ice | January |
| 1/29/16 | 124012.2927 | 5.093464737 | Ice | January |
| 1/29/16 | 75793.20178 | 4.879630254 | Ice | January |
| 1/29/16 | 6589.319151 | 3.818840543 | Ice | January |

|         |             |             |     |          |
|---------|-------------|-------------|-----|----------|
| 2/1/16  | 1637830.931 | 6.214269069 | Ice | February |
| 2/1/16  | 843657.0756 | 5.926165953 | Ice | February |
| 2/1/16  | 671240.9853 | 5.826878466 | Ice | February |
| 2/1/16  | 316432.7736 | 5.500281458 | Ice | February |
| 2/1/16  | 250023.7798 | 5.397981316 | Ice | February |
| 2/1/16  | 233098.9762 | 5.367540366 | Ice | February |
| 2/1/16  | 164926.9316 | 5.217291579 | Ice | February |
| 2/1/16  | 149250.896  | 5.173916947 | Ice | February |
| 2/1/16  | 133848.9684 | 5.126615028 | Ice | February |
| 2/1/16  | 82731.21263 | 4.91766939  | Ice | February |
| 2/2/16  | 363708.4534 | 5.560753395 | Ice | February |
| 2/2/16  | 331309.2607 | 5.520233575 | Ice | February |
| 2/2/16  | 291424.6892 | 5.464526342 | Ice | February |
| 2/2/16  | 177202.4392 | 5.248469696 | Ice | February |
| 2/2/16  | 79590.75051 | 4.9008626   | Ice | February |
| 2/2/16  | 46877.87084 | 4.670967878 | Ice | February |
| 2/3/16  | 686203.7604 | 5.836453094 | Ice | February |
| 2/3/16  | 657168.4238 | 5.817676688 | Ice | February |
| 2/3/16  | 296560.5896 | 5.472113436 | Ice | February |
| 2/3/16  | 289897.4896 | 5.462244455 | Ice | February |
| 2/3/16  | 286044.8626 | 5.456434152 | Ice | February |
| 2/3/16  | 222239.4842 | 5.34682122  | Ice | February |
| 2/3/16  | 120397.5515 | 5.080617655 | Ice | February |
| 2/3/16  | 66215.78893 | 4.820961558 | Ice | February |
| 2/4/16  | 719107.5432 | 5.856793844 | Ice | February |
| 2/4/16  | 489819.9406 | 5.690036461 | Ice | February |
| 2/4/16  | 105420.1772 | 5.022923742 | Ice | February |
| 2/4/16  | 100340.9238 | 5.001478095 | Ice | February |
| 2/4/16  | 93033.01356 | 4.968637089 | Ice | February |
| 2/5/16  | 687714.6132 | 5.837408253 | Ice | February |
| 2/5/16  | 1177.097195 | 3.070812325 | Ice | February |
| 2/8/16  | 465742.9575 | 5.668146297 | Ice | February |
| 2/9/16  | 441519.9247 | 5.644950307 | Ice | February |
| 2/9/16  | 398049.9081 | 5.599937528 | Ice | February |
| 2/9/16  | 170765.9787 | 5.232401352 | Ice | February |
| 2/9/16  | 42103.79265 | 4.624321218 | Ice | February |
| 2/12/16 | 376006.6599 | 5.575195537 | Ice | February |
| 2/12/16 | 293401.418  | 5.467462208 | Ice | February |
| 2/12/16 | 267921.7908 | 5.428008037 | Ice | February |

|         |             |             |     |          |
|---------|-------------|-------------|-----|----------|
| 2/12/16 | 81954.24678 | 4.913571463 | Ice | February |
| 2/12/16 | 11901.94498 | 4.075617938 | Ice | February |
| 2/18/16 | 314316.3131 | 5.497366922 | Ice | February |
| 2/18/16 | 154516.7366 | 5.188975527 | Ice | February |
| 2/19/16 | 217078.9857 | 5.336617784 | Ice | February |
| 2/19/16 | 195757.1471 | 5.291717627 | Ice | February |
| 2/22/16 | 1815422.365 | 6.258977681 | Ice | February |
| 2/22/16 | 829444.7575 | 5.918787467 | Ice | February |
| 2/22/16 | 640436.809  | 5.806476285 | Ice | February |
| 2/22/16 | 327509.2542 | 5.515223576 | Ice | February |
| 2/22/16 | 91016.126   | 4.959118346 | Ice | February |
| 2/22/16 | 2763.042755 | 3.441387605 | Ice | February |
| 2/25/16 | 572992.9054 | 5.758149245 | Ice | February |
| 2/25/16 | 131813.6795 | 5.119960483 | Ice | February |
| 2/25/16 | 129619.6157 | 5.11267073  | Ice | February |
| 2/25/16 | 44342.14823 | 4.646816729 | Ice | February |
| 2/26/16 | 14161.37323 | 4.151105369 | Ice | February |
| 2/26/16 | 6650.861324 | 3.822877893 | Ice | February |
| 2/26/16 | 1623.899149 | 3.210559054 | Ice | February |
| 2/26/16 | 1451.399835 | 3.161787069 | Ice | February |
| 2/29/16 | 600196.9154 | 5.778293759 | Ice | February |
| 2/29/16 | 305175.2262 | 5.484549275 | Ice | February |
| 2/29/16 | 106688.9184 | 5.028119312 | Ice | February |
| 2/29/16 | 1228055.182 | 6.089217882 | Ice | February |
| 3/2/16  | 1003089.842 | 6.001339832 | Ice | March    |
| 3/2/16  | 548246.2549 | 5.738975674 | Ice | March    |
| 3/2/16  | 350317.2414 | 5.544461512 | Ice | March    |
| 3/2/16  | 291215.7929 | 5.464214923 | Ice | March    |
| 3/2/16  | 8523.987218 | 3.93064279  | Ice | March    |
| 3/2/16  | 3633.907002 | 3.560373809 | Ice | March    |
| 3/3/16  | 1517803.729 | 6.181215615 | Ice | March    |
| 3/3/16  | 482133.5304 | 5.683167336 | Ice | March    |
| 3/3/16  | 478662.8114 | 5.680029687 | Ice | March    |
| 3/3/16  | 273643.9974 | 5.437185926 | Ice | March    |
| 3/3/16  | 224890.518  | 5.351971145 | Ice | March    |
| 3/3/16  | 169119.872  | 5.228194641 | Ice | March    |
| 3/4/16  | 27517956.66 | 7.439616182 | Ice | March    |
| 3/4/16  | 777008.4975 | 5.890425768 | Ice | March    |
| 3/4/16  | 650092.448  | 5.812975121 | Ice | March    |

|         |             |             |          |       |
|---------|-------------|-------------|----------|-------|
| 3/4/16  | 1493.304084 | 3.174148253 | Ice      | March |
| 3/7/16  | 636416.3779 | 5.803741347 | Ice      | March |
| 3/7/16  | 614533.2728 | 5.788545402 | Ice      | March |
| 3/7/16  | 502928.2711 | 5.701506049 | Ice      | March |
| 3/7/16  | 299067.921  | 5.475769832 | Ice      | March |
| 3/7/16  | 65167.17113 | 4.814028869 | Ice      | March |
| 3/7/16  | 736.9906563 | 2.867461982 | Ice      | March |
| 3/8/16  | 726833.3295 | 5.861434834 | Ice      | March |
| 3/8/16  | 500244.5375 | 5.699182355 | Ice      | March |
| 3/8/16  | 379582.5702 | 5.579306262 | Ice      | March |
| 3/8/16  | 111795.4758 | 5.048424229 | Ice      | March |
| 3/8/16  | 46016.77889 | 4.662916215 | Ice      | March |
| 3/8/16  | 2300.303729 | 3.361785183 | Ice      | March |
| 3/9/16  | 805369299.9 | 8.905995071 | Ice      | March |
| 3/9/16  | 1024977.623 | 6.010714384 | Ice      | March |
| 3/9/16  | 703409.3314 | 5.847208125 | Ice      | March |
| 3/9/16  | 513690.3752 | 5.710701429 | Ice      | March |
| 3/9/16  | 195.7670138 | 2.291739516 | Ice      | March |
| 3/10/16 | 802653.1411 | 5.90452791  | Ice Free | March |
| 3/10/16 | 371272.5271 | 5.569692814 | Ice Free | March |
| 3/10/16 | 360959.3791 | 5.557458331 | Ice Free | March |
| 3/10/16 | 328443.5354 | 5.516460718 | Ice Free | March |
| 3/10/16 | 90842.04481 | 4.958286901 | Ice Free | March |
| 3/11/16 | 311130.5417 | 5.492942645 | Ice Free | March |
| 3/11/16 | 222892.5111 | 5.348095477 | Ice Free | March |
| 3/11/16 | 181112.2856 | 5.257947911 | Ice Free | March |
| 3/11/16 | 103711.3733 | 5.015826385 | Ice Free | March |
| 3/11/16 | 78005.29975 | 4.89212411  | Ice Free | March |
| 3/11/16 | 18725.56328 | 4.27243489  | Ice Free | March |
| 3/14/16 | 1823326.888 | 6.260864536 | Ice Free | March |
| 3/14/16 | 1505581.482 | 6.177704264 | Ice Free | March |
| 3/14/16 | 673732.0036 | 5.828487178 | Ice Free | March |
| 3/14/16 | 386395.8279 | 5.587032428 | Ice Free | March |
| 3/14/16 | 315233.0855 | 5.498631793 | Ice Free | March |
| 3/15/16 | 1146398.948 | 6.059335779 | Ice Free | March |
| 3/15/16 | 877324.884  | 5.943160448 | Ice Free | March |
| 3/15/16 | 773937.9462 | 5.888706141 | Ice Free | March |
| 3/15/16 | 563308.678  | 5.750746442 | Ice Free | March |
| 3/15/16 | 9783.341138 | 3.990487197 | Ice Free | March |

|         |             |             |          |       |
|---------|-------------|-------------|----------|-------|
| 3/21/16 | 3710234.861 | 6.569401402 | Ice Free | March |
| 3/21/16 | 1274119.878 | 6.105210291 | Ice Free | March |
| 3/21/16 | 1114757.022 | 6.047180217 | Ice Free | March |
| 3/21/16 | 513833.1941 | 5.710822157 | Ice Free | March |
| 3/21/16 | 369519.5766 | 5.567637452 | Ice Free | March |
| 3/22/16 | 8889258.768 | 6.948865549 | Ice Free | March |
| 3/22/16 | 823663.9706 | 5.915750069 | Ice Free | March |
| 3/22/16 | 451628.4805 | 5.654781322 | Ice Free | March |
| 3/22/16 | 451250.6678 | 5.654417858 | Ice Free | March |
| 3/22/16 | 73759.45153 | 4.867817679 | Ice Free | March |
| 3/22/16 | 42057.86908 | 4.623847265 | Ice Free | March |
| 3/23/16 | 2216917.621 | 6.345749555 | Ice Free | March |
| 3/23/16 | 1228482.287 | 6.089368899 | Ice Free | March |
| 3/23/16 | 627610.8491 | 5.797690442 | Ice Free | March |
| 3/23/16 | 122504.8071 | 5.088153131 | Ice Free | March |
| 3/23/16 | 33444.2382  | 4.524321308 | Ice Free | March |
| 3/24/16 | 2892455.203 | 6.461266642 | Ice Free | March |
| 3/24/16 | 595526.9638 | 5.77490143  | Ice Free | March |
| 3/24/16 | 581862.5788 | 5.764820427 | Ice Free | March |
| 3/24/16 | 165.0345884 | 2.217574974 | Ice Free | March |
| 3/24/16 | 119.5600081 | 2.077585936 | Ice Free | March |
| 3/28/16 | 1431610.137 | 6.155824765 | Ice Free | March |
| 3/28/16 | 1146120.837 | 6.059230408 | Ice Free | March |
| 3/28/16 | 770884.0725 | 5.886989073 | Ice Free | March |
| 3/28/16 | 583123.0769 | 5.765760229 | Ice Free | March |
| 3/28/16 | 404788.8689 | 5.607228562 | Ice Free | March |
| 3/28/16 | 284000.7848 | 5.45331954  | Ice Free | March |
| 3/29/16 | 6222802.401 | 6.793986011 | Ice Free | March |
| 3/29/16 | 1721231.49  | 6.235839283 | Ice Free | March |
| 3/29/16 | 1328975.607 | 6.12351701  | Ice Free | March |
| 3/29/16 | 1079867.068 | 6.033370297 | Ice Free | March |
| 3/29/16 | 867863.9096 | 5.938451628 | Ice Free | March |
| 3/31/16 | 7949166.287 | 6.900321582 | Ice Free | March |
| 3/31/16 | 2802209.891 | 6.447500662 | Ice Free | March |
| 3/31/16 | 1087472.691 | 6.03641836  | Ice Free | March |
| 3/31/16 | 365144.2708 | 5.562464491 | Ice Free | March |
| 3/31/16 | 352532.0307 | 5.547198583 | Ice Free | March |
| 3/31/16 | 92005.17049 | 4.963812234 | Ice Free | March |
| 4/2/16  | 2525280.142 | 6.402309564 | Ice Free | April |

|         |             |             |          |       |
|---------|-------------|-------------|----------|-------|
| 4/2/16  | 459931.8505 | 5.662693486 | Ice Free | April |
| 4/5/16  | 1001687.728 | 6.000732353 | Ice Free | April |
| 4/5/16  | 887949.8535 | 5.94838844  | Ice Free | April |
| 4/5/16  | 733390.4405 | 5.865335245 | Ice Free | April |
| 4/5/16  | 79.45368568 | 1.900114048 | Ice Free | April |
| 4/7/16  | 1001341.44  | 6.00058219  | Ice Free | April |
| 4/7/16  | 743014.1593 | 5.87099709  | Ice Free | April |
| 4/7/16  | 706753.1516 | 5.849267754 | Ice Free | April |
| 4/7/16  | 672204.9867 | 5.82750173  | Ice Free | April |
| 4/8/16  | 975692.8082 | 5.989313104 | Ice Free | April |
| 4/8/16  | 864481.8716 | 5.93675589  | Ice Free | April |
| 4/8/16  | 613521.1882 | 5.787829566 | Ice Free | April |
| 4/8/16  | 68873.48159 | 4.838052037 | Ice Free | April |
| 4/12/16 | 209246651.5 | 8.320658517 | Ice Free | April |
| 4/12/16 | 14697423.11 | 7.167241197 | Ice Free | April |
| 4/12/16 | 721617.4011 | 5.858306997 | Ice Free | April |
| 4/12/16 | 161.5324277 | 2.20825972  | Ice Free | April |
| 4/13/16 | 331174.8813 | 5.520057389 | Ice Free | April |
| 4/13/16 | 210559.4882 | 5.323374816 | Ice Free | April |
| 4/13/16 | 187151.3498 | 5.272192964 | Ice Free | April |
| 4/13/16 | 115907.4074 | 5.064111192 | Ice Free | April |
| 4/13/16 | 10629.86402 | 4.026527709 | Ice Free | April |
| 4/13/16 | 4077.784925 | 3.610424316 | Ice Free | April |
| 4/14/16 | 496943.0707 | 5.696306639 | Ice Free | April |
| 4/14/16 | 366113.2609 | 5.56361546  | Ice Free | April |
| 4/14/16 | 265177.8599 | 5.423537261 | Ice Free | April |
| 4/14/16 | 4025.45469  | 3.604814943 | Ice Free | April |
| 4/14/16 | 2622.559155 | 3.418725293 | Ice Free | April |
| 4/18/16 | 325075.2985 | 5.51198397  | Ice Free | April |
| 4/18/16 | 300992.6989 | 5.478555961 | Ice Free | April |
| 4/18/16 | 235193.0944 | 5.371424566 | Ice Free | April |
| 4/18/16 | 139641.4402 | 5.145014319 | Ice Free | April |
| 4/19/16 | 151489.6404 | 5.180382935 | Ice Free | April |
| 4/19/16 | 107832.0671 | 5.032747931 | Ice Free | April |
| 4/19/16 | 85493.35489 | 4.93193236  | Ice Free | April |
| 4/19/16 | 73441.13085 | 4.865939356 | Ice Free | April |
| 4/19/16 | 6369.637417 | 3.804114711 | Ice Free | April |
| 4/20/16 | 172580.7805 | 5.236992429 | Ice Free | April |
| 4/20/16 | 165337.9641 | 5.218372586 | Ice Free | April |

|         |             |             |          |       |
|---------|-------------|-------------|----------|-------|
| 4/20/16 | 140780.5748 | 5.148542734 | Ice Free | April |
| 4/20/16 | 133409.2418 | 5.125185916 | Ice Free | April |
| 4/20/16 | 91221.71822 | 4.960098248 | Ice Free | April |
| 4/20/16 | 78337.47785 | 4.893969585 | Ice Free | April |

**Supplemental Table 5:** qPCR data for bacterial 16S rRNA gene copy numbers for determination of bacterial abundance.

| Date    | Copies Bacteria | log_bacterial_copies | Ice      | Month    |
|---------|-----------------|----------------------|----------|----------|
| 11/2/15 | 1.15E+08        | 8.06                 | Ice Free | November |
| 11/2/15 | 6.58E+06        | 6.82                 | Ice Free | November |
| 11/2/15 | 5.33E+06        | 6.73                 | Ice Free | November |
| 11/2/15 | 9.14E+04        | 4.96                 | Ice Free | November |
| 11/2/15 | 7.23E+02        | 2.86                 | Ice Free | November |
| 11/3/15 | 6.03E+06        | 6.78                 | Ice Free | November |
| 11/3/15 | 4.17E+06        | 6.62                 | Ice Free | November |
| 11/3/15 | 3.06E+06        | 6.49                 | Ice Free | November |
| 11/3/15 | 1.09E+06        | 6.04                 | Ice Free | November |
| 11/3/15 | 5.00E+05        | 5.70                 | Ice Free | November |
| 11/3/15 | 4.47E+05        | 5.65                 | Ice Free | November |
| 11/4/15 | 3.64E+09        | 9.56                 | Ice Free | November |
| 11/4/15 | 1.08E+07        | 7.03                 | Ice Free | November |
| 11/4/15 | 3.04E+06        | 6.48                 | Ice Free | November |
| 11/4/15 | 2.89E+06        | 6.46                 | Ice Free | November |
| 11/5/15 | 1.34E+04        | 4.13                 | Ice Free | November |
| 11/5/15 | 4.81E+03        | 3.68                 | Ice Free | November |
| 11/5/15 | 4.33E+03        | 3.64                 | Ice Free | November |
| 11/5/15 | 3.28E+03        | 3.52                 | Ice Free | November |
| 11/5/15 | 1.70E+03        | 3.23                 | Ice Free | November |
| 11/5/15 | 1.46E+03        | 3.16                 | Ice Free | November |
| 11/6/15 | 9.06E+06        | 6.96                 | Ice Free | November |
| 11/6/15 | 5.68E+06        | 6.75                 | Ice Free | November |
| 11/6/15 | 3.21E+06        | 6.51                 | Ice Free | November |
| 11/6/15 | 2.47E+06        | 6.39                 | Ice Free | November |
| 11/6/15 | 2.12E+06        | 6.33                 | Ice Free | November |
| 11/6/15 | 7.03E+04        | 4.85                 | Ice Free | November |
| 11/9/15 | 5.32E+09        | 9.73                 | Ice Free | November |
| 11/9/15 | 7.65E+07        | 7.88                 | Ice Free | November |
| 11/9/15 | 5.54E+06        | 6.74                 | Ice Free | November |

|          |          |       |          |          |
|----------|----------|-------|----------|----------|
| 11/9/15  | 9.33E+05 | 5.97  | Ice Free | November |
| 11/10/15 | 1.18E+07 | 7.07  | Ice Free | November |
| 11/10/15 | 9.42E+06 | 6.97  | Ice Free | November |
| 11/10/15 | 7.32E+06 | 6.86  | Ice Free | November |
| 11/10/15 | 6.27E+06 | 6.80  | Ice Free | November |
| 11/10/15 | 8.02E+05 | 5.90  | Ice Free | November |
| 11/10/15 | 5.54E+05 | 5.74  | Ice Free | November |
| 11/11/15 | 4.80E+06 | 6.68  | Ice Free | November |
| 11/11/15 | 3.37E+06 | 6.53  | Ice Free | November |
| 11/11/15 | 3.32E+06 | 6.52  | Ice Free | November |
| 11/11/15 | 3.03E+06 | 6.48  | Ice Free | November |
| 11/11/15 | 2.04E+04 | 4.31  | Ice Free | November |
| 11/12/15 | 2.72E+06 | 6.43  | Ice Free | November |
| 11/12/15 | 2.43E+06 | 6.39  | Ice Free | November |
| 11/12/15 | 2.15E+06 | 6.33  | Ice Free | November |
| 11/12/15 | 2.08E+06 | 6.32  | Ice Free | November |
| 11/12/15 | 1.43E+06 | 6.16  | Ice Free | November |
| 11/12/15 | 1.26E+06 | 6.10  | Ice Free | November |
| 11/13/15 | 8.88E+06 | 6.95  | Ice Free | November |
| 11/13/15 | 4.79E+06 | 6.68  | Ice Free | November |
| 11/13/15 | 4.50E+06 | 6.65  | Ice Free | November |
| 11/13/15 | 3.08E+06 | 6.49  | Ice Free | November |
| 11/13/15 | 2.98E+06 | 6.47  | Ice Free | November |
| 11/13/15 | 2.57E+06 | 6.41  | Ice Free | November |
| 11/16/15 | 8.88E+06 | 6.95  | Ice Free | November |
| 11/16/15 | 4.58E+06 | 6.66  | Ice Free | November |
| 11/16/15 | 3.43E+06 | 6.54  | Ice Free | November |
| 11/16/15 | 1.00E+06 | 6.00  | Ice Free | November |
| 11/16/15 | 2.10E+05 | 5.32  | Ice Free | November |
| 11/17/15 | 1.14E+10 | 10.10 | Ice Free | November |
| 11/17/15 | 3.55E+04 | 4.55  | Ice Free | November |
| 11/18/15 | 8.98E+06 | 6.95  | Ice Free | November |
| 11/18/15 | 5.44E+06 | 6.74  | Ice Free | November |
| 11/18/15 | 4.94E+06 | 6.69  | Ice Free | November |
| 11/18/15 | 4.06E+06 | 6.61  | Ice Free | November |
| 11/18/15 | 1.18E+06 | 6.07  | Ice Free | November |
| 11/18/15 | 7.04E+05 | 5.85  | Ice Free | November |
| 11/19/15 | 1.34E+07 | 7.13  | Ice Free | November |
| 11/19/15 | 1.14E+07 | 7.06  | Ice Free | November |



|          |          |       |          |          |
|----------|----------|-------|----------|----------|
| 11/19/15 | 6.24E+06 | 6.80  | Ice Free | November |
| 11/19/15 | 4.71E+06 | 6.67  | Ice Free | November |
| 11/19/15 | 3.10E+06 | 6.49  | Ice Free | November |
| 11/19/15 | 2.81E+06 | 6.45  | Ice Free | November |
| 11/20/15 | 7.42E+07 | 7.87  | Ice Free | November |
| 11/20/15 | 2.49E+07 | 7.40  | Ice Free | November |
| 11/20/15 | 1.57E+07 | 7.20  | Ice Free | November |
| 11/20/15 | 1.08E+07 | 7.03  | Ice Free | November |
| 11/20/15 | 8.29E+06 | 6.92  | Ice Free | November |
| 11/20/15 | 5.91E+06 | 6.77  | Ice Free | November |
| 11/23/15 | 9.32E+06 | 6.97  | Ice Free | November |
| 11/23/15 | 8.35E+06 | 6.92  | Ice Free | November |
| 11/23/15 | 3.60E+05 | 5.56  | Ice Free | November |
| 11/23/15 | 7.01E+04 | 4.85  | Ice Free | November |
| 11/24/15 | 1.02E+07 | 7.01  | Ice Free | November |
| 11/24/15 | 3.22E+06 | 6.51  | Ice Free | November |
| 11/24/15 | 2.90E+06 | 6.46  | Ice Free | November |
| 11/24/15 | 2.25E+06 | 6.35  | Ice Free | November |
| 11/24/15 | 2.03E+06 | 6.31  | Ice Free | November |
| 11/24/15 | 7.50E+04 | 4.88  | Ice Free | November |
| 11/25/15 | 6.87E+06 | 6.84  | Ice Free | November |
| 11/25/15 | 4.66E+06 | 6.67  | Ice Free | November |
| 11/25/15 | 2.42E+06 | 6.38  | Ice Free | November |
| 11/25/15 | 7.16E+04 | 4.85  | Ice Free | November |
| 11/26/15 | 1.32E+09 | 9.12  | Ice Free | November |
| 11/26/15 | 2.56E+07 | 7.41  | Ice Free | November |
| 11/26/15 | 1.93E+07 | 7.29  | Ice Free | November |
| 11/26/15 | 1.65E+07 | 7.22  | Ice Free | November |
| 11/26/15 | 1.60E+07 | 7.20  | Ice Free | November |
| 11/27/15 | 4.53E+07 | 7.66  | Ice Free | November |
| 11/27/15 | 4.43E+07 | 7.65  | Ice Free | November |
| 11/27/15 | 3.42E+07 | 7.53  | Ice Free | November |
| 11/27/15 | 2.46E+07 | 7.39  | Ice Free | November |
| 11/30/15 | 1.43E+10 | 10.20 | Ice Free | November |
| 11/30/15 | 2.11E+06 | 6.32  | Ice Free | November |
| 11/30/15 | 1.54E+06 | 6.19  | Ice Free | November |
| 12/1/15  | 2.36E+07 | 7.37  | Ice Free | December |
| 12/1/15  | 1.49E+07 | 7.17  | Ice Free | December |
| 12/1/15  | 1.07E+07 | 7.03  | Ice Free | December |

|          |          |      |          |          |
|----------|----------|------|----------|----------|
| 12/1/15  | 6.93E+06 | 6.84 | Ice Free | December |
| 12/1/15  | 5.85E+06 | 6.77 | Ice Free | December |
| 12/1/15  | 4.34E+06 | 6.64 | Ice Free | December |
| 12/2/15  | 2.28E+08 | 8.36 | Ice Free | December |
| 12/2/15  | 1.72E+07 | 7.24 | Ice Free | December |
| 12/2/15  | 1.68E+07 | 7.23 | Ice Free | December |
| 12/2/15  | 1.30E+07 | 7.11 | Ice Free | December |
| 12/2/15  | 1.25E+07 | 7.10 | Ice Free | December |
| 12/2/15  | 1.16E+07 | 7.06 | Ice Free | December |
| 12/3/15  | 1.84E+07 | 7.26 | Ice Free | December |
| 12/3/15  | 1.38E+07 | 7.14 | Ice Free | December |
| 12/3/15  | 1.20E+07 | 7.08 | Ice Free | December |
| 12/3/15  | 1.14E+07 | 7.06 | Ice Free | December |
| 12/3/15  | 7.04E+06 | 6.85 | Ice Free | December |
| 12/3/15  | 6.34E+06 | 6.80 | Ice Free | December |
| 12/4/15  | 1.25E+06 | 6.10 | Ice Free | December |
| 12/4/15  | 8.46E+05 | 5.93 | Ice Free | December |
| 12/4/15  | 2.97E+05 | 5.47 | Ice Free | December |
| 12/4/15  | 6.63E+04 | 4.82 | Ice Free | December |
| 12/7/15  | 5.06E+07 | 7.70 | Ice Free | December |
| 12/7/15  | 1.40E+07 | 7.15 | Ice Free | December |
| 12/7/15  | 1.24E+07 | 7.09 | Ice Free | December |
| 12/7/15  | 8.49E+06 | 6.93 | Ice Free | December |
| 12/7/15  | 7.43E+06 | 6.87 | Ice Free | December |
| 12/7/15  | 2.98E+06 | 6.47 | Ice Free | December |
| 12/8/15  | 1.76E+07 | 7.25 | Ice Free | December |
| 12/8/15  | 1.17E+07 | 7.07 | Ice Free | December |
| 12/8/15  | 1.13E+07 | 7.05 | Ice Free | December |
| 12/8/15  | 8.69E+06 | 6.94 | Ice Free | December |
| 12/8/15  | 8.21E+06 | 6.91 | Ice Free | December |
| 12/8/15  | 9.56E+05 | 5.98 | Ice Free | December |
| 12/9/15  | 2.39E+07 | 7.38 | Ice Free | December |
| 12/9/15  | 2.20E+07 | 7.34 | Ice Free | December |
| 12/9/15  | 1.30E+07 | 7.11 | Ice Free | December |
| 12/10/15 | 1.39E+07 | 7.14 | Ice Free | December |
| 12/10/15 | 1.33E+07 | 7.12 | Ice Free | December |
| 12/10/15 | 7.46E+06 | 6.87 | Ice Free | December |
| 12/11/15 | 3.13E+07 | 7.50 | Ice Free | December |
| 12/11/15 | 1.96E+07 | 7.29 | Ice Free | December |

|          |          |      |          |          |
|----------|----------|------|----------|----------|
| 12/11/15 | 1.02E+07 | 7.01 | Ice Free | December |
| 12/11/15 | 3.73E+06 | 6.57 | Ice Free | December |
| 12/11/15 | 2.67E+04 | 4.43 | Ice Free | December |
| 12/14/15 | 1.01E+07 | 7.00 | Ice Free | December |
| 12/14/15 | 9.72E+06 | 6.99 | Ice Free | December |
| 12/14/15 | 7.56E+06 | 6.88 | Ice Free | December |
| 12/14/15 | 7.39E+06 | 6.87 | Ice Free | December |
| 12/14/15 | 6.79E+06 | 6.83 | Ice Free | December |
| 12/14/15 | 6.14E+06 | 6.79 | Ice Free | December |
| 12/15/15 | 8.63E+07 | 7.94 | Ice Free | December |
| 12/15/15 | 1.38E+07 | 7.14 | Ice Free | December |
| 12/15/15 | 1.15E+07 | 7.06 | Ice Free | December |
| 12/15/15 | 8.03E+06 | 6.90 | Ice Free | December |
| 12/15/15 | 1.66E+06 | 6.22 | Ice Free | December |
| 12/15/15 | 1.24E+06 | 6.09 | Ice Free | December |
| 12/16/15 | 3.16E+06 | 6.50 | Ice Free | December |
| 12/16/15 | 2.54E+06 | 6.40 | Ice Free | December |
| 12/16/15 | 2.22E+06 | 6.35 | Ice Free | December |
| 12/16/15 | 2.03E+06 | 6.31 | Ice Free | December |
| 12/16/15 | 1.85E+06 | 6.27 | Ice Free | December |
| 12/16/15 | 6.89E+04 | 4.84 | Ice Free | December |
| 12/17/15 | 6.68E+06 | 6.82 | Ice Free | December |
| 12/17/15 | 5.65E+06 | 6.75 | Ice Free | December |
| 12/17/15 | 5.20E+06 | 6.72 | Ice Free | December |
| 12/17/15 | 3.85E+06 | 6.59 | Ice Free | December |
| 12/17/15 | 2.68E+06 | 6.43 | Ice Free | December |
| 12/17/15 | 2.66E+06 | 6.42 | Ice Free | December |
| 12/18/15 | 3.02E+08 | 8.48 | Ice Free | December |
| 12/18/15 | 2.65E+08 | 8.42 | Ice Free | December |
| 12/18/15 | 2.33E+08 | 8.37 | Ice Free | December |
| 12/18/15 | 1.13E+06 | 6.05 | Ice Free | December |
| 12/18/15 | 4.78E+05 | 5.68 | Ice Free | December |
| 12/18/15 | 2.90E+05 | 5.46 | Ice Free | December |
| 12/21/15 | 3.52E+07 | 7.55 | Ice Free | December |
| 12/21/15 | 2.44E+07 | 7.39 | Ice Free | December |
| 12/21/15 | 2.43E+07 | 7.39 | Ice Free | December |
| 12/21/15 | 1.43E+07 | 7.16 | Ice Free | December |
| 12/21/15 | 9.13E+06 | 6.96 | Ice Free | December |
| 12/21/15 | 8.23E+06 | 6.92 | Ice Free | December |

|          |          |      |          |          |
|----------|----------|------|----------|----------|
| 12/22/15 | 1.54E+07 | 7.19 | Ice Free | December |
| 12/22/15 | 1.04E+07 | 7.02 | Ice Free | December |
| 12/22/15 | 1.91E+06 | 6.28 | Ice Free | December |
| 12/22/15 | 1.89E+06 | 6.28 | Ice Free | December |
| 12/22/15 | 1.13E+06 | 6.05 | Ice Free | December |
| 12/22/15 | 6.95E+05 | 5.84 | Ice Free | December |
| 12/23/15 | 1.05E+07 | 7.02 | Ice Free | December |
| 12/23/15 | 9.77E+06 | 6.99 | Ice Free | December |
| 12/23/15 | 5.68E+06 | 6.75 | Ice Free | December |
| 12/23/15 | 5.41E+06 | 6.73 | Ice Free | December |
| 12/23/15 | 4.39E+06 | 6.64 | Ice Free | December |
| 12/23/15 | 1.78E+06 | 6.25 | Ice Free | December |
| 1/4/16   | 1.30E+07 | 7.11 | Ice      | January  |
| 1/4/16   | 8.52E+06 | 6.93 | Ice      | January  |
| 1/4/16   | 7.64E+06 | 6.88 | Ice      | January  |
| 1/4/16   | 4.55E+06 | 6.66 | Ice      | January  |
| 1/4/16   | 4.52E+06 | 6.66 | Ice      | January  |
| 1/4/16   | 3.15E+06 | 6.50 | Ice      | January  |
| 1/5/16   | 2.20E+09 | 9.34 | Ice      | January  |
| 1/5/16   | 1.51E+07 | 7.18 | Ice      | January  |
| 1/5/16   | 1.03E+07 | 7.01 | Ice      | January  |
| 1/5/16   | 7.91E+06 | 6.90 | Ice      | January  |
| 1/5/16   | 1.47E+05 | 5.17 | Ice      | January  |
| 1/5/16   | 3.47E+04 | 4.54 | Ice      | January  |
| 1/6/16   | 1.22E+07 | 7.09 | Ice      | January  |
| 1/6/16   | 9.57E+06 | 6.98 | Ice      | January  |
| 1/6/16   | 8.37E+06 | 6.92 | Ice      | January  |
| 1/6/16   | 5.35E+06 | 6.73 | Ice      | January  |
| 1/6/16   | 5.15E+06 | 6.71 | Ice      | January  |
| 1/6/16   | 1.20E+05 | 5.08 | Ice      | January  |
| 1/7/16   | 7.89E+08 | 8.90 | Ice      | January  |
| 1/7/16   | 1.32E+07 | 7.12 | Ice      | January  |
| 1/7/16   | 1.09E+07 | 7.04 | Ice      | January  |
| 1/8/16   | 3.70E+07 | 7.57 | Ice      | January  |
| 1/8/16   | 2.97E+07 | 7.47 | Ice      | January  |
| 1/8/16   | 2.00E+07 | 7.30 | Ice      | January  |
| 1/8/16   | 1.71E+07 | 7.23 | Ice      | January  |
| 1/8/16   | 1.38E+07 | 7.14 | Ice      | January  |
| 1/8/16   | 1.17E+07 | 7.07 | Ice      | January  |

|         |          |      |     |         |
|---------|----------|------|-----|---------|
| 1/11/16 | 2.97E+08 | 8.47 | Ice | January |
| 1/11/16 | 1.24E+07 | 7.09 | Ice | January |
| 1/11/16 | 1.12E+07 | 7.05 | Ice | January |
| 1/11/16 | 9.10E+06 | 6.96 | Ice | January |
| 1/11/16 | 5.75E+06 | 6.76 | Ice | January |
| 1/11/16 | 3.94E+06 | 6.60 | Ice | January |
| 1/12/16 | 1.35E+08 | 8.13 | Ice | January |
| 1/12/16 | 1.34E+07 | 7.13 | Ice | January |
| 1/12/16 | 1.15E+07 | 7.06 | Ice | January |
| 1/12/16 | 9.05E+03 | 3.96 | Ice | January |
| 1/12/16 | 7.87E+03 | 3.90 | Ice | January |
| 1/12/16 | 5.23E+03 | 3.72 | Ice | January |
| 1/13/16 | 1.31E+07 | 7.12 | Ice | January |
| 1/13/16 | 9.83E+06 | 6.99 | Ice | January |
| 1/13/16 | 7.93E+06 | 6.90 | Ice | January |
| 1/13/16 | 8.13E+03 | 3.91 | Ice | January |
| 1/13/16 | 4.64E+03 | 3.67 | Ice | January |
| 1/13/16 | 3.53E+03 | 3.55 | Ice | January |
| 1/14/16 | 3.86E+09 | 9.59 | Ice | January |
| 1/14/16 | 1.08E+07 | 7.03 | Ice | January |
| 1/14/16 | 9.61E+06 | 6.98 | Ice | January |
| 1/14/16 | 7.94E+06 | 6.90 | Ice | January |
| 1/14/16 | 4.27E+06 | 6.63 | Ice | January |
| 1/14/16 | 5.79E+03 | 3.76 | Ice | January |
| 1/15/16 | 1.26E+07 | 7.10 | Ice | January |
| 1/15/16 | 1.02E+07 | 7.01 | Ice | January |
| 1/15/16 | 8.80E+06 | 6.94 | Ice | January |
| 1/15/16 | 7.75E+06 | 6.89 | Ice | January |
| 1/15/16 | 6.31E+06 | 6.80 | Ice | January |
| 1/15/16 | 3.12E+06 | 6.49 | Ice | January |
| 1/18/16 | 2.44E+07 | 7.39 | Ice | January |
| 1/18/16 | 1.18E+07 | 7.07 | Ice | January |
| 1/18/16 | 1.08E+07 | 7.03 | Ice | January |
| 1/18/16 | 8.15E+06 | 6.91 | Ice | January |
| 1/18/16 | 2.93E+06 | 6.47 | Ice | January |
| 1/18/16 | 5.14E+04 | 4.71 | Ice | January |
| 1/19/16 | 6.92E+06 | 6.84 | Ice | January |
| 1/19/16 | 5.05E+06 | 6.70 | Ice | January |
| 1/19/16 | 5.03E+06 | 6.70 | Ice | January |

|         |          |      |     |         |
|---------|----------|------|-----|---------|
| 1/19/16 | 4.37E+06 | 6.64 | Ice | January |
| 1/19/16 | 2.16E+05 | 5.33 | Ice | January |
| 1/19/16 | 2.83E+04 | 4.45 | Ice | January |
| 1/20/16 | 1.31E+07 | 7.12 | Ice | January |
| 1/20/16 | 8.24E+06 | 6.92 | Ice | January |
| 1/20/16 | 7.82E+06 | 6.89 | Ice | January |
| 1/20/16 | 6.55E+06 | 6.82 | Ice | January |
| 1/20/16 | 6.54E+06 | 6.82 | Ice | January |
| 1/20/16 | 4.21E+06 | 6.62 | Ice | January |
| 1/21/16 | 1.47E+06 | 6.17 | Ice | January |
| 1/22/16 | 9.63E+07 | 7.98 | Ice | January |
| 1/22/16 | 9.25E+04 | 4.97 | Ice | January |
| 1/25/16 | 2.54E+06 | 6.40 | Ice | January |
| 1/25/16 | 1.04E+06 | 6.02 | Ice | January |
| 1/25/16 | 2.05E+05 | 5.31 | Ice | January |
| 1/25/16 | 1.64E+04 | 4.21 | Ice | January |
| 1/25/16 | 8.02E+02 | 2.90 | Ice | January |
| 1/26/16 | 6.28E+06 | 6.80 | Ice | January |
| 1/26/16 | 3.98E+06 | 6.60 | Ice | January |
| 1/26/16 | 2.39E+06 | 6.38 | Ice | January |
| 1/26/16 | 7.69E+05 | 5.89 | Ice | January |
| 1/26/16 | 5.10E+05 | 5.71 | Ice | January |
| 1/26/16 | 1.55E+04 | 4.19 | Ice | January |
| 1/27/16 | 3.19E+06 | 6.50 | Ice | January |
| 1/27/16 | 2.98E+06 | 6.47 | Ice | January |
| 1/27/16 | 2.23E+06 | 6.35 | Ice | January |
| 1/27/16 | 2.01E+06 | 6.30 | Ice | January |
| 1/27/16 | 9.95E+05 | 6.00 | Ice | January |
| 1/27/16 | 2.94E+04 | 4.47 | Ice | January |
| 1/28/16 | 3.45E+06 | 6.54 | Ice | January |
| 1/28/16 | 8.82E+05 | 5.95 | Ice | January |
| 1/28/16 | 5.65E+05 | 5.75 | Ice | January |
| 1/28/16 | 3.14E+05 | 5.50 | Ice | January |
| 1/28/16 | 2.27E+05 | 5.36 | Ice | January |
| 1/28/16 | 1.14E+04 | 4.06 | Ice | January |
| 1/29/16 | 4.08E+06 | 6.61 | Ice | January |
| 1/29/16 | 2.34E+06 | 6.37 | Ice | January |
| 1/29/16 | 1.43E+06 | 6.16 | Ice | January |
| 1/29/16 | 9.62E+05 | 5.98 | Ice | January |

|         |          |      |     |          |
|---------|----------|------|-----|----------|
| 1/29/16 | 9.31E+05 | 5.97 | Ice | January  |
| 1/29/16 | 5.67E+05 | 5.75 | Ice | January  |
| 2/1/16  | 3.12E+06 | 6.49 | Ice | February |
| 2/1/16  | 2.63E+06 | 6.42 | Ice | February |
| 2/1/16  | 1.35E+06 | 6.13 | Ice | February |
| 2/1/16  | 7.36E+05 | 5.87 | Ice | February |
| 2/1/16  | 7.07E+05 | 5.85 | Ice | February |
| 2/1/16  | 2.09E+05 | 5.32 | Ice | February |
| 2/2/16  | 1.14E+06 | 6.06 | Ice | February |
| 2/2/16  | 6.49E+05 | 5.81 | Ice | February |
| 2/2/16  | 3.03E+05 | 5.48 | Ice | February |
| 2/2/16  | 2.60E+05 | 5.41 | Ice | February |
| 2/2/16  | 2.44E+05 | 5.39 | Ice | February |
| 2/2/16  | 1.67E+05 | 5.22 | Ice | February |
| 2/3/16  | 1.62E+06 | 6.21 | Ice | February |
| 2/3/16  | 1.54E+06 | 6.19 | Ice | February |
| 2/3/16  | 1.27E+06 | 6.10 | Ice | February |
| 2/3/16  | 1.18E+06 | 6.07 | Ice | February |
| 2/3/16  | 3.05E+05 | 5.48 | Ice | February |
| 2/3/16  | 9.70E+04 | 4.99 | Ice | February |
| 2/4/16  | 1.36E+06 | 6.13 | Ice | February |
| 2/4/16  | 8.04E+05 | 5.91 | Ice | February |
| 2/4/16  | 6.96E+05 | 5.84 | Ice | February |
| 2/4/16  | 4.99E+05 | 5.70 | Ice | February |
| 2/4/16  | 4.50E+05 | 5.65 | Ice | February |
| 2/4/16  | 1.32E+05 | 5.12 | Ice | February |
| 2/5/16  | 2.50E+06 | 6.40 | Ice | February |
| 2/5/16  | 5.68E+05 | 5.75 | Ice | February |
| 2/5/16  | 4.66E+04 | 4.67 | Ice | February |
| 2/5/16  | 1.29E+04 | 4.11 | Ice | February |
| 2/5/16  | 1.19E+04 | 4.08 | Ice | February |
| 2/5/16  | 7.19E+03 | 3.86 | Ice | February |
| 2/8/16  | 3.29E+06 | 6.52 | Ice | February |
| 2/8/16  | 2.59E+06 | 6.41 | Ice | February |
| 2/8/16  | 1.35E+06 | 6.13 | Ice | February |
| 2/8/16  | 8.05E+05 | 5.91 | Ice | February |
| 2/8/16  | 6.16E+03 | 3.79 | Ice | February |
| 2/8/16  | 1.57E+03 | 3.20 | Ice | February |
| 2/9/16  | 1.28E+06 | 6.11 | Ice | February |

|         |          |      |     |          |
|---------|----------|------|-----|----------|
| 2/9/16  | 7.90E+05 | 5.90 | Ice | February |
| 2/9/16  | 4.45E+05 | 5.65 | Ice | February |
| 2/9/16  | 2.23E+03 | 3.35 | Ice | February |
| 2/11/16 | 3.26E+06 | 6.51 | Ice | February |
| 2/11/16 | 2.59E+06 | 6.41 | Ice | February |
| 2/11/16 | 2.36E+06 | 6.37 | Ice | February |
| 2/11/16 | 2.16E+06 | 6.33 | Ice | February |
| 2/11/16 | 1.87E+06 | 6.27 | Ice | February |
| 2/11/16 | 1.53E+06 | 6.18 | Ice | February |
| 2/12/16 | 4.05E+05 | 5.61 | Ice | February |
| 2/12/16 | 3.74E+05 | 5.57 | Ice | February |
| 2/12/16 | 2.28E+05 | 5.36 | Ice | February |
| 2/12/16 | 4.94E+04 | 4.69 | Ice | February |
| 2/12/16 | 3.87E+02 | 2.59 | Ice | February |
| 2/15/16 | 3.86E+06 | 6.59 | Ice | February |
| 2/15/16 | 3.49E+06 | 6.54 | Ice | February |
| 2/15/16 | 3.00E+06 | 6.48 | Ice | February |
| 2/15/16 | 2.48E+06 | 6.39 | Ice | February |
| 2/15/16 | 9.30E+05 | 5.97 | Ice | February |
| 2/15/16 | 8.43E+05 | 5.93 | Ice | February |
| 2/16/16 | 3.09E+06 | 6.49 | Ice | February |
| 2/16/16 | 2.16E+06 | 6.33 | Ice | February |
| 2/16/16 | 1.88E+06 | 6.27 | Ice | February |
| 2/16/16 | 1.78E+06 | 6.25 | Ice | February |
| 2/16/16 | 1.49E+06 | 6.17 | Ice | February |
| 2/16/16 | 9.38E+05 | 5.97 | Ice | February |
| 2/18/16 | 2.55E+06 | 6.41 | Ice | February |
| 2/18/16 | 2.25E+06 | 6.35 | Ice | February |
| 2/18/16 | 2.09E+06 | 6.32 | Ice | February |
| 2/18/16 | 1.65E+06 | 6.22 | Ice | February |
| 2/18/16 | 1.43E+06 | 6.16 | Ice | February |
| 2/18/16 | 8.22E+05 | 5.91 | Ice | February |
| 2/19/16 | 5.45E+06 | 6.74 | Ice | February |
| 2/19/16 | 4.75E+06 | 6.68 | Ice | February |
| 2/19/16 | 3.06E+06 | 6.49 | Ice | February |
| 2/19/16 | 3.05E+06 | 6.48 | Ice | February |
| 2/19/16 | 2.87E+06 | 6.46 | Ice | February |
| 2/19/16 | 1.15E+06 | 6.06 | Ice | February |
| 2/22/16 | 4.47E+06 | 6.65 | Ice | February |



|         |          |      |     |          |
|---------|----------|------|-----|----------|
| 2/22/16 | 3.65E+06 | 6.56 | Ice | February |
| 2/22/16 | 1.10E+06 | 6.04 | Ice | February |
| 2/22/16 | 7.18E+05 | 5.86 | Ice | February |
| 2/22/16 | 6.01E+04 | 4.78 | Ice | February |
| 2/22/16 | 3.16E+04 | 4.50 | Ice | February |
| 2/23/16 | 8.64E+06 | 6.94 | Ice | February |
| 2/23/16 | 4.58E+06 | 6.66 | Ice | February |
| 2/23/16 | 3.98E+06 | 6.60 | Ice | February |
| 2/23/16 | 3.49E+06 | 6.54 | Ice | February |
| 2/23/16 | 2.35E+06 | 6.37 | Ice | February |
| 2/23/16 | 1.95E+06 | 6.29 | Ice | February |
| 2/25/16 | 2.01E+06 | 6.30 | Ice | February |
| 2/25/16 | 1.71E+06 | 6.23 | Ice | February |
| 2/25/16 | 1.28E+06 | 6.11 | Ice | February |
| 2/25/16 | 1.01E+06 | 6.00 | Ice | February |
| 2/25/16 | 4.70E+04 | 4.67 | Ice | February |
| 2/25/16 | 3.96E+04 | 4.60 | Ice | February |
| 2/26/16 | 3.95E+06 | 6.60 | Ice | February |
| 2/26/16 | 2.11E+06 | 6.32 | Ice | February |
| 2/26/16 | 1.75E+06 | 6.24 | Ice | February |
| 2/26/16 | 1.44E+06 | 6.16 | Ice | February |
| 2/26/16 | 1.35E+06 | 6.13 | Ice | February |
| 2/26/16 | 9.80E+05 | 5.99 | Ice | February |
| 2/29/16 | 3.68E+06 | 6.57 | Ice | February |
| 2/29/16 | 2.88E+06 | 6.46 | Ice | February |
| 2/29/16 | 2.37E+06 | 6.37 | Ice | February |
| 2/29/16 | 2.00E+06 | 6.30 | Ice | February |
| 2/29/16 | 9.77E+05 | 5.99 | Ice | February |
| 2/29/16 | 7.54E+05 | 5.88 | Ice | February |
| 3/2/16  | 3.06E+06 | 6.49 | Ice | March    |
| 3/2/16  | 1.42E+06 | 6.15 | Ice | March    |
| 3/2/16  | 1.33E+06 | 6.12 | Ice | March    |
| 3/2/16  | 1.12E+06 | 6.05 | Ice | March    |
| 3/2/16  | 8.36E+05 | 5.92 | Ice | March    |
| 3/2/16  | 2.98E+05 | 5.47 | Ice | March    |
| 3/3/16  | 4.05E+06 | 6.61 | Ice | March    |
| 3/3/16  | 2.02E+06 | 6.31 | Ice | March    |
| 3/3/16  | 1.80E+06 | 6.26 | Ice | March    |
| 3/3/16  | 1.48E+06 | 6.17 | Ice | March    |

|         |          |      |          |       |
|---------|----------|------|----------|-------|
| 3/3/16  | 1.02E+06 | 6.01 | Ice      | March |
| 3/3/16  | 9.72E+05 | 5.99 | Ice      | March |
| 3/4/16  | 3.99E+06 | 6.60 | Ice      | March |
| 3/4/16  | 3.47E+06 | 6.54 | Ice      | March |
| 3/4/16  | 3.44E+06 | 6.54 | Ice      | March |
| 3/4/16  | 3.12E+06 | 6.49 | Ice      | March |
| 3/4/16  | 2.96E+04 | 4.47 | Ice      | March |
| 3/4/16  | 1.24E+04 | 4.09 | Ice      | March |
| 3/7/16  | 4.57E+06 | 6.66 | Ice      | March |
| 3/7/16  | 4.27E+06 | 6.63 | Ice      | March |
| 3/7/16  | 2.67E+06 | 6.43 | Ice      | March |
| 3/7/16  | 2.59E+06 | 6.41 | Ice      | March |
| 3/7/16  | 2.53E+06 | 6.40 | Ice      | March |
| 3/7/16  | 2.42E+06 | 6.38 | Ice      | March |
| 3/8/16  | 4.87E+06 | 6.69 | Ice      | March |
| 3/8/16  | 4.04E+06 | 6.61 | Ice      | March |
| 3/8/16  | 3.91E+06 | 6.59 | Ice      | March |
| 3/8/16  | 2.35E+06 | 6.37 | Ice      | March |
| 3/8/16  | 1.95E+04 | 4.29 | Ice      | March |
| 3/8/16  | 1.73E+04 | 4.24 | Ice      | March |
| 3/9/16  | 5.84E+06 | 6.77 | Ice      | March |
| 3/9/16  | 3.95E+06 | 6.60 | Ice      | March |
| 3/9/16  | 1.71E+06 | 6.23 | Ice      | March |
| 3/9/16  | 1.28E+06 | 6.11 | Ice      | March |
| 3/9/16  | 6.15E+05 | 5.79 | Ice      | March |
| 3/9/16  | 2.75E+05 | 5.44 | Ice      | March |
| 3/10/16 | 4.03E+06 | 6.61 | Ice Free | March |
| 3/10/16 | 3.74E+06 | 6.57 | Ice Free | March |
| 3/10/16 | 3.58E+06 | 6.55 | Ice Free | March |
| 3/10/16 | 2.87E+06 | 6.46 | Ice Free | March |
| 3/10/16 | 2.43E+06 | 6.39 | Ice Free | March |
| 3/10/16 | 2.05E+06 | 6.31 | Ice Free | March |
| 3/11/16 | 5.12E+06 | 6.71 | Ice Free | March |
| 3/11/16 | 3.82E+06 | 6.58 | Ice Free | March |
| 3/11/16 | 3.79E+06 | 6.58 | Ice Free | March |
| 3/11/16 | 3.38E+06 | 6.53 | Ice Free | March |
| 3/11/16 | 2.94E+06 | 6.47 | Ice Free | March |
| 3/11/16 | 2.07E+06 | 6.32 | Ice Free | March |
| 3/14/16 | 6.61E+06 | 6.82 | Ice Free | March |

|         |          |      |          |       |
|---------|----------|------|----------|-------|
| 3/14/16 | 5.66E+06 | 6.75 | Ice Free | March |
| 3/14/16 | 4.50E+06 | 6.65 | Ice Free | March |
| 3/14/16 | 3.31E+06 | 6.52 | Ice Free | March |
| 3/14/16 | 2.09E+06 | 6.32 | Ice Free | March |
| 3/14/16 | 1.86E+06 | 6.27 | Ice Free | March |
| 3/15/16 | 5.01E+06 | 6.70 | Ice Free | March |
| 3/15/16 | 4.39E+06 | 6.64 | Ice Free | March |
| 3/15/16 | 2.90E+06 | 6.46 | Ice Free | March |
| 3/15/16 | 2.77E+06 | 6.44 | Ice Free | March |
| 3/15/16 | 2.76E+06 | 6.44 | Ice Free | March |
| 3/15/16 | 2.64E+06 | 6.42 | Ice Free | March |
| 3/21/16 | 1.27E+07 | 7.10 | Ice Free | March |
| 3/21/16 | 1.21E+07 | 7.08 | Ice Free | March |
| 3/21/16 | 6.49E+06 | 6.81 | Ice Free | March |
| 3/21/16 | 5.18E+06 | 6.71 | Ice Free | March |
| 3/21/16 | 4.73E+06 | 6.67 | Ice Free | March |
| 3/21/16 | 4.12E+06 | 6.61 | Ice Free | March |
| 3/22/16 | 1.09E+07 | 7.04 | Ice Free | March |
| 3/22/16 | 1.07E+07 | 7.03 | Ice Free | March |
| 3/22/16 | 7.66E+06 | 6.88 | Ice Free | March |
| 3/22/16 | 7.02E+06 | 6.85 | Ice Free | March |
| 3/22/16 | 4.44E+06 | 6.65 | Ice Free | March |
| 3/22/16 | 3.68E+06 | 6.57 | Ice Free | March |
| 3/23/16 | 9.02E+06 | 6.96 | Ice Free | March |
| 3/23/16 | 7.20E+06 | 6.86 | Ice Free | March |
| 3/23/16 | 6.79E+06 | 6.83 | Ice Free | March |
| 3/23/16 | 6.64E+06 | 6.82 | Ice Free | March |
| 3/23/16 | 4.89E+06 | 6.69 | Ice Free | March |
| 3/23/16 | 3.09E+06 | 6.49 | Ice Free | March |
| 3/24/16 | 2.23E+07 | 7.35 | Ice Free | March |
| 3/24/16 | 1.96E+07 | 7.29 | Ice Free | March |
| 3/24/16 | 1.71E+07 | 7.23 | Ice Free | March |
| 3/24/16 | 9.09E+06 | 6.96 | Ice Free | March |
| 3/24/16 | 1.71E+04 | 4.23 | Ice Free | March |
| 3/24/16 | 1.41E+04 | 4.15 | Ice Free | March |
| 3/28/16 | 3.77E+07 | 7.58 | Ice Free | March |
| 3/28/16 | 3.03E+07 | 7.48 | Ice Free | March |
| 3/28/16 | 2.98E+07 | 7.47 | Ice Free | March |
| 3/28/16 | 2.54E+07 | 7.40 | Ice Free | March |

|         |          |      |          |       |
|---------|----------|------|----------|-------|
| 3/28/16 | 1.51E+07 | 7.18 | Ice Free | March |
| 3/28/16 | 3.77E+06 | 6.58 | Ice Free | March |
| 3/29/16 | 2.42E+07 | 7.38 | Ice Free | March |
| 3/29/16 | 1.42E+07 | 7.15 | Ice Free | March |
| 3/29/16 | 1.18E+07 | 7.07 | Ice Free | March |
| 3/29/16 | 8.76E+06 | 6.94 | Ice Free | March |
| 3/29/16 | 7.06E+06 | 6.85 | Ice Free | March |
| 3/29/16 | 5.55E+06 | 6.74 | Ice Free | March |
| 3/31/16 | 3.91E+07 | 7.59 | Ice Free | March |
| 3/31/16 | 1.66E+07 | 7.22 | Ice Free | March |
| 3/31/16 | 1.24E+07 | 7.09 | Ice Free | March |
| 3/31/16 | 1.01E+07 | 7.00 | Ice Free | March |
| 3/31/16 | 3.24E+06 | 6.51 | Ice Free | March |
| 3/31/16 | 3.24E+06 | 6.51 | Ice Free | March |
| 4/5/16  | 1.32E+07 | 7.12 | Ice Free | April |
| 4/5/16  | 1.05E+07 | 7.02 | Ice Free | April |
| 4/5/16  | 8.43E+06 | 6.93 | Ice Free | April |
| 4/5/16  | 5.02E+06 | 6.70 | Ice Free | April |
| 4/5/16  | 4.81E+06 | 6.68 | Ice Free | April |
| 4/5/16  | 1.99E+05 | 5.30 | Ice Free | April |
| 4/7/16  | 2.03E+07 | 7.31 | Ice Free | April |
| 4/7/16  | 1.98E+07 | 7.30 | Ice Free | April |
| 4/7/16  | 1.67E+07 | 7.22 | Ice Free | April |
| 4/7/16  | 1.55E+07 | 7.19 | Ice Free | April |
| 4/7/16  | 1.45E+07 | 7.16 | Ice Free | April |
| 4/7/16  | 1.02E+07 | 7.01 | Ice Free | April |
| 4/8/16  | 3.10E+07 | 7.49 | Ice Free | April |
| 4/8/16  | 1.62E+07 | 7.21 | Ice Free | April |
| 4/8/16  | 1.38E+07 | 7.14 | Ice Free | April |
| 4/8/16  | 1.37E+07 | 7.14 | Ice Free | April |
| 4/8/16  | 8.58E+06 | 6.93 | Ice Free | April |
| 4/8/16  | 5.35E+06 | 6.73 | Ice Free | April |
| 4/12/16 | 2.96E+07 | 7.47 | Ice Free | April |
| 4/12/16 | 2.23E+07 | 7.35 | Ice Free | April |
| 4/12/16 | 6.10E+06 | 6.79 | Ice Free | April |
| 4/12/16 | 5.64E+06 | 6.75 | Ice Free | April |
| 4/12/16 | 5.10E+06 | 6.71 | Ice Free | April |
| 4/12/16 | 4.38E+06 | 6.64 | Ice Free | April |
| 4/13/16 | 8.58E+06 | 6.93 | Ice Free | April |

|         |          |      |          |       |
|---------|----------|------|----------|-------|
| 4/13/16 | 8.22E+06 | 6.91 | Ice Free | April |
| 4/13/16 | 6.37E+06 | 6.80 | Ice Free | April |
| 4/13/16 | 4.73E+06 | 6.67 | Ice Free | April |
| 4/13/16 | 4.55E+06 | 6.66 | Ice Free | April |
| 4/14/16 | 1.62E+07 | 7.21 | Ice Free | April |
| 4/14/16 | 1.60E+07 | 7.20 | Ice Free | April |
| 4/14/16 | 1.31E+07 | 7.12 | Ice Free | April |
| 4/14/16 | 9.28E+06 | 6.97 | Ice Free | April |
| 4/14/16 | 8.38E+06 | 6.92 | Ice Free | April |
| 4/14/16 | 2.21E+06 | 6.34 | Ice Free | April |
| 4/18/16 | 7.21E+06 | 6.86 | Ice Free | April |
| 4/18/16 | 5.62E+06 | 6.75 | Ice Free | April |
| 4/18/16 | 4.98E+06 | 6.70 | Ice Free | April |
| 4/18/16 | 4.65E+06 | 6.67 | Ice Free | April |
| 4/18/16 | 2.56E+06 | 6.41 | Ice Free | April |
| 4/18/16 | 1.37E+06 | 6.14 | Ice Free | April |
| 4/19/16 | 6.90E+06 | 6.84 | Ice Free | April |
| 4/19/16 | 6.68E+06 | 6.82 | Ice Free | April |
| 4/19/16 | 4.93E+06 | 6.69 | Ice Free | April |
| 4/19/16 | 3.98E+06 | 6.60 | Ice Free | April |
| 4/19/16 | 3.74E+06 | 6.57 | Ice Free | April |
| 4/19/16 | 3.22E+06 | 6.51 | Ice Free | April |
| 4/20/16 | 1.64E+07 | 7.21 | Ice Free | April |
| 4/20/16 | 1.27E+07 | 7.10 | Ice Free | April |
| 4/20/16 | 1.25E+07 | 7.10 | Ice Free | April |
| 4/20/16 | 1.04E+07 | 7.02 | Ice Free | April |
| 4/20/16 | 7.80E+06 | 6.89 | Ice Free | April |
| 4/20/16 | 2.66E+05 | 5.42 | Ice Free | April |
